1 **Decoding the role of CBLB for innate immune responses regulating**  
2 **systemic dissemination during Non-Tuberculous Mycobacteria**  
3 **infection**

4  
5 Srinivasu Mudalagiriappa<sup>1#</sup>, Jaishree Sharma<sup>1#</sup>, Hazem F. M. Abdelaal<sup>2</sup>, Thomas C. Kelly<sup>3</sup>,  
6 Woosuk Choi<sup>1</sup>, Miranda D. Vieson<sup>4</sup>, Adel M. Talaat<sup>2</sup> and Som G. Nanjappa<sup>1\*</sup>

7  
8 <sup>1</sup> Department of Pathobiology, University of Illinois at Urbana-Champaign, Urbana, IL 61802,  
9 USA

10  
11 <sup>2</sup> Department of Pathobiological Sciences, School of Veterinary Medicine, University of  
12 Wisconsin-Madison, WI 53706, USA

13  
14 <sup>3</sup> Integrative Biology Honors program, University Illinois at Urbana-Champaign, Urbana, IL  
15 61801 USA

16  
17 <sup>4</sup> Veterinary Diagnostic Laboratory, University of Illinois at Urbana-Champaign, Urbana, IL  
18 61802, USA

19  
20  
21 # Equal contribution

22 \* Corresponding author

23 E-mail: [nanjappa@illinois.edu](mailto:nanjappa@illinois.edu)

24 Phone: (217) 300 6124

25 Fax: (217) 244 7421

26  
27 **Running head: CBLB role in NTM dissemination**

28 **Footnotes**

29 This work was supported by Start-up funds, Dept. of Pathobiology, UIUC (SGN) and NIH R21  
30 AI119945 (SGN).

31 **Abstract**

32 Non-Tuberculous Mycobacteria (NTM) are ubiquitous in nature, present in soil and water, and  
33 cause primary leading to disseminated infections in immunocompromised individuals. NTM  
34 infections are surging in recent years due to an increase in an immune-suppressed population,  
35 medical interventions, and patients with underlying lung diseases. Host regulators of innate  
36 immune responses, frontiers for controlling infections and dissemination, are poorly defined  
37 during NTM infections. Here, we describe the role of CBLB, an E3-ubiquitin ligase, for innate  
38 immune responses and disease progression in a mouse model of NTM infection under  
39 compromised T-cell immunity. We found that CBLB thwarted NTM growth and dissemination  
40 in a time- and infection route- dependent manner. Mechanistically, we uncovered defects in  
41 many innate immune cells in the absence of *Cblb*, including poor responses of NK cells,  
42 inflammatory monocytes, and conventional dendritic cells. Strikingly, *Cblb*-deficient  
43 macrophages were competent to control NTM growth *in vitro*. Histopathology suggested the lack  
44 of early formation of granulomatous inflammation in the absence of CBLB. Collectively, CBLB  
45 is essential to mount productive innate immune responses and help prevent the dissemination  
46 during an NTM infection under T-cell deficiency.

47

48

49

50

51

52

53

54

55

56

## 57 Introduction

58  
59 Nontuberculous mycobacteria (NTM) or atypical mycobacteria, distinct from tuberculosis  
60 causing mycobacteria, are widely distributed in the environment. However, among 190 species,  
61 only a handful of NTM, predominantly of *Mycobacterium avium* complex (MAC) species are  
62 isolated from infected patients. Infections caused by MAC are globally prevalent (47%-80%),  
63 causing mortality up to 42% (Prevots et al., 2017; Ruth and van Ingen, 2017; Spaulding et al.,  
64 2017; Diel et al., 2018). Further, it is estimated that NTM infections are rising at a rate of 8%  
65 annually associated with increasing immune-suppressed population, including the patients with  
66 underlying lung diseases and the geriatric population (Adjemian et al., 2012; Winthrop et al.,  
67 2019). Thus, with the global prevalence and ubiquitous nature of bacteria, NTM infections are  
68 increasing in a susceptible population at an alarming rate. The emergence of drug resistance and  
69 poor understanding of protective immune correlates of NTM infections, further complicate the  
70 disease control and prevention (Horne and Skerrett, 2019). Innate immune cell responses, key  
71 orchestrators of initial infection control and adaptive immunity, are poorly defined during NTM  
72 infections.

73  
74 Casitas B-lineage lymphoma (*Cblb*) is an E3 ubiquitin ligase shown to regulate both innate and  
75 adaptive immune responses, with a well-studied role for adaptive immune responses (Liu et al.,  
76 2014; Tang et al., 2019). CBLB is widely expressed in peripheral lymphoid cells, including  
77 several innate immune cells, and is a well-known negative regulator of T cell responses  
78 (Bachmaier et al., 2000; Jeon et al., 2004; Paolino and Penninger, 2010). Ablation of *Cblb*  
79 potentiated T cell responses, and *Cblb*-deficient mice spontaneously rejected tumors in a CD8<sup>+</sup>  
80 T-cell dependent manner (Loeser et al., 2007). *Cblb* deficiency facilitated T cell activation  
81 independent of CD28 requirement (Chiang et al., 2000), and the lack of CBLB has been  
82 implicated in breaking peripheral tolerance and contributing to autoimmunity/allergic responses  
83 (Paolino and Penninger, 2010; Oh et al., 2011; Paolino et al., 2011; Lutz-Nicoladoni et al., 2015;  
84 Singh et al., 2018; Tang et al., 2019). Further, *Cblb* can be targeted to bolster the CD8<sup>+</sup> T cell  
85 responses for fungal vaccine immunity even in the absence of CD4<sup>+</sup> T-cell help (Nanjappa et al.,  
86 2018), suggesting translational implications. CBLB, in T cells, targets several important  
87 signaling pathway proteins, including PLC $\gamma$ 1, VAV1, NEDD4, PKC $\theta$ , WASP, and Crk-L,  
88 mainly by polyubiquitination and their degradation (Tang et al., 2019). Notably, several SNPs in  
89 *Cblb* gene are identified in humans and have been associated with several diseases or disorders  
90 that are directly or indirectly implicated with T cells (Kosoy et al., 2004; International Multiple  
91 Sclerosis Genetics et al., 2007; Payne et al., 2007; Perez et al., 2010; Sanna et al., 2010; Doniz-  
92 Padilla et al., 2011; DeWan et al., 2012; Sturner et al., 2014; Li et al., 2018). Thus, CBLB acts as  
93 a negative regulator of T-cell functions by targeting key signaling molecules required for T-cell  
94 activation.

95  
96 While CBLB roles are well defined for adaptive immunity, its functions are poorly described for  
97 innate immunity, especially during infections. Accumulating data suggest its diverse functions in  
98 many innate immune cells. The development of macrophages, dendritic cells, and NK cells seem  
99 to be intact in the absence of *Cblb* (Loeser and Penninger, 2007). However, deficiency of *Cblb* in  
100 NK cells potentiated their functions; production of IFN $\gamma$  and antitumor activity (Yasuda et al.,  
101 2002; Paolino et al., 2014; Chirino et al., 2019). In macrophages, CBLB prevented LPS-induced  
102 septic shock by downregulating TLR4 (Bachmaier et al., 2007). Recently, CBLB has been

103 shown to downregulate Syk kinase, and its ablation/inhibition led to enhanced production of  
104 proinflammatory cytokines, the release of reactive oxygen species (ROS), and fungal killing by  
105 macrophages (Wirnsberger et al., 2016; Xiao et al., 2016; Zhu et al., 2016). Further, CBLB has  
106 regulatory roles in dendritic cells (DC) by modulating the functions, both positively and  
107 negatively (Arron et al., 2001; Wallner et al., 2013; Tang et al., 2019). Nevertheless, CBLB  
108 functions in innate immunity during mycobacterial diseases are not deciphered.

109

110 In this study, we systematically evaluated the role of CBLB for innate immunity and  
111 dissemination of bacteria in a mouse model of NTM infection with deficient T-cell responses.  
112 We assessed the bacterial control and innate immune cell numbers/responses following both  
113 intratracheal and intravenous infections for up to 5 months. We describe the critical role of  
114 CBLB in dictating the pathogenesis of NTM infection that was associated with multiple  
115 defective or altered dynamics of innate immune cell numbers or their responses.

116

117

118

119

120

121

122

123

124

125

126

127

128

129

130

131

132

133

134

135

136

137

138

139

140

141

142

143

144

145

146

147

148

## 149 **Materials and Methods**

150  
151 *Mice*: The OT-I Tg (TCR $\alpha$ /TCR $\beta$  specific for OT-I epitope; Stock #: 003831) and B6.PL-  
152 Thy1a/Cy/Thy1.1 (Thy1.1; Stock #: 000406) were purchased from Jackson Laboratories. *Cblb*<sup>-/-</sup>  
153 mice were provided by P.S. Ohashi (University of Toronto, Ontario, Canada) with permission  
154 from Josef Penninger (IMBA, Austria). OTI-Tg mice were backcrossed with *Cblb*<sup>-/-</sup> to generate  
155 OT-I Tg-*Cblb*<sup>-/-</sup> mice at the UW-Madison facility and were transferred to the current facility with  
156 the facilitation from Bruce Klein, UW-Madison. All mice were maintained under specific-  
157 pathogen-free conditions at the University of Illinois at Urbana-Champaign (UIUC). All  
158 experiments were conducted in accordance with the guidelines of the Institutional Animal Care  
159 and Use Committee of the UIUC.

160 *Infections*: Six- to eight-week-old mice were used for all the infections in this study.  
161 Recombinant dsRED<sup>+</sup> Kanamycin-resistant *Mycobacterium avium* strain 104 (MAV 104) was  
162 cultured in Middlebrook 7H9 broth (Difco) supplemented with albumin, dextrose and catalase  
163 (ADC) and Kanamycin, and at ~OD of 0.8-1.0, culture was centrifuged and resuspended in  
164 sterile PBS for infection. Mice were either infected intravenously (I.V.) with 1x10<sup>6</sup> Colony  
165 Forming Units (CFU) or intratracheally (I.T. by intubation under sedation) with 1x10<sup>5</sup> CFU.

166 *In vitro* experiments: For *in vitro* infections, bone-marrow-derived cells (Macrophages-BMM:  
167 GM-CSF-10ng/ml for six days) were infected with either 5 MOI or 10 MOI (Multiplicity of  
168 Infection; bacteria:cells) of bacteria in RPMI supplemented with 10% FBS (complete media).  
169 After 4hr incubation, BMM cells were washed to remove any floating/non-adherent bacteria, and  
170 were incubated further in complete media. Bone-marrow-derived neutrophils (BMN), isolated  
171 following the protocol (Swamydas and Lionakis, 2013), were infected with 5 MOI of dsRED<sup>+ve</sup>  
172 MAV104 and analyzed by flow cytometry.

173 *Bacterial burden in tissues/BMM cultures*: Infected cells or tissues were harvested,  
174 homogenized, and plated on BD Middlebrook 7H10 agar plates supplemented with ADC and  
175 Kanamycin. Infected BMMs were lysed using 1% Triton X-100 before plating.

176 *Flow Cytometry*: The tissues (lung and spleen) were harvested on indicated time-points, single-  
177 cell suspensions were prepared using BD Cell Strainers, and RBCs were lysed using 4%  
178 ammonium chloride containing buffer. Similarly, bone-marrow-derived cells were harvested  
179 from the plates either by scraping (BMM) or collecting (BMN) at indicated times during *in vitro*  
180 experiments. Cells were then stained with the fluorochrome-conjugated antibodies (BD  
181 Biosciences, Biolegend, and Invitrogen) along with Live/Dead staining (Invitrogen) for 30' at 4°  
182 C in the dark. For measuring cytokine production by NK cells, infected cells were incubated with  
183 Golgi Stop (BD Biosciences) for the last 4hrs before subjecting for fluorochrome-conjugated  
184 antibody staining for surface markers and intracellular cytokine (Perm/Fix buffer, BD  
185 Biosciences). Cells were analyzed by 24-color compatible *full-spectrum* Cytex Aurora flow  
186 analyzer (College of Veterinary Medicine, UIUC).

187 *Confocal Microscopy*: BMM cells were plated on micro-slide glass bottom wells (ibidi) a day  
188 before infection. At 48-hr post-infection, wells were washed with PBS, and stained with dyes  
189 (DAPI, LysoTracker, and CellROX; Molecular Probes) for 30' at 37° C. Wells were washed and  
190 resuspended in complete media before the microscopy. Images (at least ten distinct fields) were

191 taken on 4-laser Nikon A1R confocal microscope (College of Veterinary Medicine, UIUC) at  
192 60x plan apo  $\lambda/1.40$  oil, and analyzed using NIS-Elements C software. For quantifying the ROS  
193 production in BMM cells from confocal images, ImageJ software of the National Institute of  
194 Health (<http://rsweb.nih.gov/ij/>) was used for each cell of the representative field.

195 *Histopathological studies:* Tissues were harvested and stored in 10% Buffered Formalin  
196 containers. Tissues were paraffin-embedded and sections were mounted on slides for H&E  
197 staining. Some sections were also stained for acid-fast bacilli with Ziehl-Neelsen stain.  
198 Histopathology was then analyzed and interpreted by a board-certified veterinary anatomic  
199 pathologist in a blinded manner.

200 *Measuring CBLB/Cblb expression:* Cells/tissues were harvested and subjected for measuring Cblb RNA  
201 and protein by qPCR, Western Blotting, and flow cytometry. For qPCR analysis: The BMM and spleens  
202 were harvested, and RNA was extracted using Qiagen RNeasy Kit according to the manufacturer's  
203 instructions. cDNA was synthesized using GoScript Reverse Transcription system (Promega), and qPCR  
204 was executed using QuantiNova SYBR Green PCR Kit (Qiagen) by Quant Studio 3 (Applied Biosystems)  
205 analyzer. Sequences of primers used are: Cblb- For: CACCCTTCTCCCAAGCATAA, Rev:  
206 AGACCGAACAGGAGCTTTGA;  $\beta$ -actin- For: TGGAGAAGAGCTATGAGCTGCCTG, Rev:  
207 GTGCCACCAGACAGCACTGTGTTG; and CCL2- For: GAAGGAATGGGTCCAGACAT, Rev:  
208 ACGGGTCAACTTCACATTCA. Western Blotting: Cells from spleen and BMM were washed 3  
209 times with ice-cold PBS and lysed by M-PER<sup>TM</sup> Mammalian Protein Extraction Reagent (Thermo  
210 Scientific) in the presence of protease inhibitor cocktail (Sigma-Aldrich) and phosphatase  
211 inhibitor cocktail (Sigma-Aldrich). Quantity of cell lysate protein was measured by Pierce<sup>TM</sup> BCA  
212 protein assay kit. CBLB and GAPDH in the protein blots were probed with anti-CBLB- and anti-  
213 GAPDH- antibodies (SC-8006 and SC-166545, respectively; Santa Cruz Biotechnology). Flow  
214 Cytometry analysis: Cells were stained with surface markers followed by intracellular staining  
215 for CBLB (anti-CBLB antibody, G-1, Santa Cruz Biotechnology), and the levels were analyzed by  
216 Cytex Aurora analyzer.

217 *Statistical Analysis:* All statistical analyses were performed using a two-tailed unpaired Student  
218 t-test using GraphPad Prism 8 software. A two-tailed P value of  $\leq 0.05$  was considered  
219 statistically significant.

220

221

222

223

224

225

226

227

228

229

230

231

232

233

## 234 **Results**

235

### 236 **Induction of CBLB following NTM infection *in vitro***

237 CBLB expression is dynamically regulated in T- and myeloid- cells. Following activation of T  
238 cells with CD28 stimulation, CBLB expression is downregulated, whereas engaging with  
239 CTLA4 and PD-1 receptors upregulate CBLB levels (Li et al., 2004; Karwacz et al., 2011). On a  
240 similar note, CBLB was upregulated in the macrophages and dendritic cells following fungal  
241 infection (Wirnsberger et al., 2016). Therefore, we were interested in assessing the levels of  
242 CBLB following NTM infection. First, we measured the basal levels of CBLB expression in  
243 macrophages using bone-marrow-derived macrophages (BMM) and primary cells (peritoneal  
244 macrophages). We found detectable levels of CBLB in uninfected *Cblb*<sup>+/+</sup> BMM (**Fig. 1A**; left  
245 panel) and was absent in *Cblb*<sup>-/-</sup> cells. Similarly, we measured CBLB levels in peritoneal  
246 macrophage cells (good source of primary macrophages; CD11b<sup>+</sup>F4/80<sup>+</sup>) and found appreciable  
247 basal levels of CBLB in *Cblb*<sup>+/+</sup> cells (**Fig. 1A**; middle panel). We found a similar phenotype  
248 with peritoneal dendritic cells (CD11c<sup>+</sup>F4/80<sup>+</sup>; **Fig. 1A**; right panel). Next, we measured the  
249 induction of *Cblb* (mRNA levels) following an NTM (*Mycobacterium avium* 104; MAV104)  
250 infection, and found that levels of *Cblb* were reduced in *Cblb*<sup>+/+</sup> BMM (**Fig. 1B**; left panel;  
251 protein levels were undetectable by Western blotting-not shown). On the contrary, mRNA levels  
252 of *Cblb* were increased in splenocytes after infection (**Fig. 1B**; right panel). Next, we measured  
253 the protein levels of CBLB in BMM, splenocytes, and peritoneal macrophages following the  
254 infection, and found that CBLB levels were significantly higher in infected *Cblb*<sup>+/+</sup> cells  
255 compared with *Cblb*<sup>-/-</sup> cells (**Fig. 1C & D**). Collectively, our data indicated that NTM infection  
256 enhances the levels of CBLB in myeloid cells.

257

### 258 **Ablation of *Cblb* promotes NTM growth and dissemination under T-cell deficiency in mice**

259 Evidence of the role of CBLB for innate immunity during infections is scarce. Recent reports  
260 suggest that CBLB constrains innate immune responses during fungal infections, and the loss of  
261 CBLB or functions enhances antifungal activities of DC & macrophages to bolster protection  
262 from lethal infection (Wirnsberger et al., 2016; Xiao et al., 2016; Zhu et al., 2016; Nanjappa et  
263 al., 2018). To investigate the role of CBLB in innate immune cells during an NTM infection, we  
264 used OT-I Tg mice (CD8<sup>+</sup> T-cell transgenic mice, where all T cells are specific for OT-I epitope  
265 of ovalbumin) and OT-I-Tg-*Cblb* KO (OT-I Tg lacking *Cblb*) as *Cblb*<sup>+/+</sup> and *Cblb*<sup>-/-</sup>,  
266 respectively (in this study). We used these mice for three main reasons: 1. Adaptive T-cell  
267 immunity is severely compromised as most of the T cells are CD8<sup>+</sup> T cells and do not recognize  
268 NTM, and have a very low number of CD4<sup>+</sup> T cells; 2. Lymphoid architecture is not affected as  
269 seen with *Rag*<sup>-/-</sup> mice (Koning and Mebius, 2012); and 3. NTM infections commonly occur in  
270 individuals with compromised T-cell functions (Henkle and Winthrop, 2015; Ratnatunga et al.,  
271 2020). We used a strain of *Mycobacterium avium* (MAV) as an NTM for our studies as most of  
272 the NTM infections (50-90%) seen in humans, accounting for up to ~40% mortality, are caused  
273 by *M. avium* complex (MAC) species (Johnson and Odell, 2014; Diel et al., 2018; Horne and  
274 Skerrett, 2019). Mice were infected by both intravenous (i.v.) and intratracheal (i.t.) routes and  
275 rested for several weeks to determine the bacterial load in the tissues and dissemination. We  
276 found that *i.v.* infection of *Cblb*<sup>+/+</sup> mice caused a gradual increase of bacterial burden in the  
277 lungs from Wk 6 to 22 post-infection (PI). In the liver and spleen, NTM bacterial kinetics was

278 either stable or increased during the later time points (**Fig. 2A**). Similarly, following intratracheal  
279 infection, the bacterial burden was increased steadily in the lungs and spleens, including  
280 mediastinal lymph nodes (draining LN of the lungs), in *Cblb*<sup>+/+</sup> mice (**Fig. 2B**). In striking  
281 contrast, the bacterial loads were significantly higher in *Cblb*<sup>-/-</sup> mice compared with *Cblb*<sup>+/+</sup>  
282 group at all the timepoints following *i.v.* infection (**Fig. 2A**). Analogously, *Cblb*<sup>-/-</sup> mice had  
283 significantly higher bacterial loads in most tissues compared with *Cblb*<sup>+/+</sup>, following *i.t.* infection  
284 (**Fig. 2B**). Further, we determined the bacterial load in the brains and found that *Cblb*<sup>-/-</sup> mice had  
285 relatively higher CFUs compared with *Cblb*<sup>+/+</sup> groups (**Supp. Fig. 1**). Collectively, our data  
286 suggest that CBLB inhibits the bacterial growth and dissemination during NTM infection under  
287 T-cell deficiency.

288  
289

### 290 ***Cblb*-deficient macrophages constrain NTM growth *in vitro***

291 Our *in vivo* bacterial burden and dissemination data (**Fig. 2**) immediately piqued our interest in  
292 dissecting the cell-intrinsic role of CBLB in macrophages, the primary target cells of  
293 mycobacteria. We infected the bone-marrow-derived macrophages (BMM) *in vitro* to determine  
294 bacterial growth (**Fig. 3A-C**). Following 4hr post-infection, BMM were washed to remove any  
295 extracellular or non-adherent bacteria and were further incubated for several days. By day 2, with  
296 5 MOI, *Cblb*<sup>-/-</sup> macrophages controlled the NTM growth significantly better than *Cblb*<sup>+/+</sup> BMM,  
297 the phenotype maintained through day 6 (**Fig. 3A**). Although we did not notice significant  
298 differences in the later time points (**Fig. 3B**), *Cblb*<sup>-/-</sup> BMM consistently had a lower bacterial  
299 burden compared with *Cblb*<sup>+/+</sup> BMM. Further, we tested with a higher infection dose (10 MOI),  
300 and the data recapitulated the lower MOI results in that *Cblb*<sup>-/-</sup> BMM controlled NTM growth  
301 significantly better, if not completely, than *Cblb*<sup>+/+</sup> BMM (**Fig. 3C**). Further, we tested if it is  
302 due to differences in the rate of phagocytosis, and found a similar intake of bacteria by both  
303 *Cblb*<sup>+/+</sup> and *Cblb*<sup>-/-</sup> BMM (**Fig. 3D**). To evaluate possible underlying factors for enhanced  
304 functions of *Cblb*-deficient BMM, we assessed the activation status and ROS production. We  
305 found, following infection, a significant augmented level of MHC-II (MFIs by flow cytometry)  
306 in *Cblb*<sup>-/-</sup> BMM compared with *Cblb*<sup>+/+</sup> (**Fig. 3E**). In a similar note, we observed CBLB  
307 diminished the production of ROS, if not significantly (**Fig. 3F**). In another approach, we  
308 infected *Cblb*<sup>+/+</sup> and *Cblb*<sup>-/-</sup> BMM with dsRED<sup>+</sup> MAV104, and at 48hr, cells were stained with  
309 dyes for confocal microscopy imaging and quantification (**Fig. 3G & H**). We found similar or  
310 enhanced staining of CellROX (Invitrogen; measuring cellular oxidative stress) that was  
311 associated with lysosomes (Lysotracker; Invitrogen) in both uninfected *Cblb*<sup>+/+</sup> and *Cblb*<sup>-/-</sup> BMM  
312 (**Fig. 3G, top panels, and 3H**). In contrast, infected *Cblb*<sup>+/+</sup> BMM had significantly less staining  
313 for CellROX compared with *Cblb*<sup>-/-</sup> cells (**Fig. 3G, bottom panels, and 3H**), suggesting a  
314 negative role of CBLB for CellROX production. Thus, our data suggest that *Cblb*-deficient  
315 macrophages are *competent* in controlling NTM growth.

316  
317

### 318 **Flow cytometric analysis of innate immune cells during an NTM infection**

319 Next, we wanted to systematically analyze the dynamics of various innate immune cell  
320 numbers/responses during the infection *in vivo* to uncover the possible mechanisms at cellular



321 levels to decipher the higher bacterial growth/dissemination in *Cblb*<sup>-/-</sup> mice. We used several  
322 fluorochrome-conjugated antibodies against different surface markers to phenotype innate  
323 immune cells and their activation status for analysis by flow cytometry (Misharin et al., 2013;  
324 Hey et al., 2017). The gating strategy for identifying the particular innate immune cell subset is  
325 shown in **Fig. 4A & B**. We excluded CD90<sup>+</sup> cells to purge thymic derived T cell population.  
326 Gating for Neutrophils and NK cells were common in both lungs and spleens. However, spleens  
327 and lungs have different DC and macrophage subsets and are depicted in **Fig. 4A & B**. In  
328 essence, the markers for delineating various innate immune cells are defined as below.  
329 Neutrophils: CD90<sup>-</sup>, CD11b<sup>+</sup>, Ly6G<sup>+</sup>; NK cells: CD90<sup>-</sup>, Ly6G<sup>-</sup>, CD11b<sup>-/+</sup>, NK1.1<sup>+</sup>; Alveolar  
330 Macrophages (lung): CD90<sup>-</sup>, Ly6G<sup>-</sup>, NK1.1<sup>-</sup>, CD11b<sup>-</sup>, CD11c<sup>+</sup>, Siglec-F<sup>+</sup>; CD103<sup>+</sup> DCs (lung):  
331 CD90<sup>-</sup>, Ly6G<sup>-</sup>, NK1.1<sup>-</sup>, CD11b<sup>-</sup>, CD11c<sup>+</sup>, CD103<sup>+</sup>; Interstitial Macrophages (lung): CD90<sup>-</sup>,  
332 Ly6G<sup>-</sup>, NK1.1<sup>-</sup>, CD11c<sup>+</sup>, CD11b<sup>+</sup>, MHC-II<sup>+</sup>, CD64<sup>+</sup>; CD11b<sup>+</sup> DC (lung): CD90<sup>-</sup>, Ly6G<sup>-</sup>, NK1.1<sup>-</sup>,  
333 CD11c<sup>+</sup>, CD11b<sup>+</sup>, MHC-II<sup>+</sup>, CD64<sup>+</sup>; Eosinophils: CD90<sup>-</sup>, Ly6G<sup>-</sup>, NK1.1<sup>-</sup>, CD11c<sup>-</sup>, CD11b<sup>+</sup>,  
334 Siglec-F<sup>+</sup>; Inflammatory monocytes: CD90<sup>-</sup>, Ly6G<sup>-</sup>, NK1.1<sup>-</sup>, CD11c<sup>-</sup>, CD11b<sup>+</sup>, Siglec-F<sup>-</sup>, Ly6C<sup>hi</sup>;  
335 Plasmacytoid DC: CD90<sup>-</sup>, Ly6G<sup>-</sup>, NK1.1<sup>-</sup>, CD11c<sup>-</sup>, CD11b<sup>-</sup>, Ly6C<sup>+</sup>; CD11b<sup>-</sup>/CD8<sup>+</sup> DC (spleen):  
336 CD90<sup>-</sup>, Ly6G<sup>-</sup>, NK1.1<sup>-</sup>, CD11b<sup>-</sup>, MHC-II<sup>+</sup>; CD11b<sup>+</sup>/CD8<sup>-</sup> DC (spleen): CD90<sup>-</sup>, Ly6G<sup>-</sup>, NK1.1<sup>-</sup>,  
337 CD11b<sup>+</sup>, MHC-II<sup>+</sup>; Ly6C<sup>+</sup>; and Resident Monocytes (spleen): CD90<sup>-</sup>, Ly6G<sup>-</sup>, NK1.1<sup>-</sup>, CD11c<sup>-</sup>,  
338 CD11b<sup>+</sup>, Ly6C<sup>+</sup>. We used this gating strategy for obtaining all flow cytometric data of innate  
339 immune cell numbers/responses during *in vivo* studies.

340

341

#### 342 **Deficiency of NK cell responses in the absence of *Cblb* during an NTM infection**

343 We first evaluated NK cell, an important innate immune subset, responses for mediating  
344 resistance to mycobacterial infections, including NTM infections (Allen et al., 2015; Garand et  
345 al., 2018; Lai et al., 2018a). NK cells are cytotoxic cells, and one of the major IFN $\gamma$  producing  
346 cells protecting against mycobacterial infections. Additionally, it has been shown that CD11b  
347 expressing NK cells are more potent in their functions (Fu et al., 2014; Allen et al., 2015;  
348 Venkatasubramanian et al., 2017; Cong and Wei, 2019). First, we examined, *in vitro*, if CBLB is  
349 expressed in and affected the NK cell functions after infection. The data showed that CBLB  
350 expression levels were significantly increased in NK cells following NTM infection (**Fig. 5A**). In  
351 congruence with published reports on negative regulation of CBLB in NK cells, we found a  
352 significantly higher production of IFN $\gamma$  in *Cblb*<sup>-/-</sup> cells, irrespective of CD11b subsets, after  
353 infection (**Fig. 5B**). Thus, we wanted to enumerate the numbers of CD11b<sup>+</sup> and CD11b<sup>-</sup> NK cells  
354 during an NTM infection *in vivo*. **Fig. 5C** shows the frequencies of CD11b<sup>+</sup> NK cells in the lung  
355 (left panels) and spleens (right panels) at Wk22 PI following *i.v.* infection. The CD11b<sup>+</sup> NK cell  
356 numbers were significantly lower in *Cblb*<sup>-/-</sup> compared with *Cblb*<sup>+/+</sup>. The frequencies of NK cells  
357 were lower (lung) or significantly reduced (spleen) following *i.v.* infection (**Fig. 5D**). We  
358 observed a similar defect, except at Wk 12PI, in CD11b<sup>+</sup> NK subset numbers following *i.t.*  
359 infection (**Fig. 5E**), suggesting that *Cblb*-deficiency blunted CD11b<sup>+</sup> NK cell responses during  
360 an NTM infection. However, we found a non-apparent (*i.v.* infection) or a significant (*i.t.*  
361 infection) effect of CBLB on CD11b<sup>-</sup> cell numbers (**Supp. Fig. 2A & B**). Thus, CBLB was  
362 required to sustain or potentiate NK cell numbers/responses during an NTM infection.

363

### 364 **Dynamics of alveolar macrophages in the absence of *Cblb* during an NTM infection**

365 Next, we investigated if CBLB regulates the number of alveolar macrophages, implicated in  
366 orchestrating mycobacterial diseases (Russell et al., 2009; Cohen et al., 2018). Here, we assessed  
367 the alveolar macrophage numbers during NTM infection. Following *i.v.* infection, we found  
368 dampened alveolar macrophage numbers in the lungs of *Cblb*<sup>-/-</sup> mice compared with *Cblb*<sup>+/+</sup>  
369 group (**Fig. 6A & B**) with a significant reduction during earlier time points, wks 6 & 12 PI.  
370 Interestingly, we found no difference of alveolar macrophage numbers in *Cblb* -sufficient and -  
371 deficient groups, except at Wk 12, following *i.t.* infection (**Fig. 6C**), suggesting the dichotomous  
372 role of CBLB depending on the route of NTM infection.

373

### 374 ***Cblb* deficiency affects inflammatory monocyte responses during an NTM infection**

375 Inflammatory monocytes dictate the outcome of several infections including mycobacterial (Shi  
376 and Pamer, 2011; Grainger et al., 2013; Liu et al., 2017; Dunlap et al., 2018; Sampath et al.,  
377 2018; Heung and Hohl, 2019), and are part of diverse populations of myeloid cells (Srivastava et  
378 al., 2014) triggered during tuberculosis for pathogenesis (Behar et al., 2010; Dorhoi et al., 2014;  
379 Lastrucci et al., 2015). Here, we evaluated the role of CBLB for inflammatory monocyte  
380 responses during NTM infection. Following *i.v.* infection, sequestration of inflammatory  
381 monocytes was overall similar between *Cblb*<sup>+/+</sup> and *Cblb*<sup>-/-</sup> mice in the lungs, but not in the  
382 spleen (**Fig. 7A & D**). In the spleen, infected *Cblb*<sup>-/-</sup> mice had significantly lower inflammatory  
383 monocytes compared with *Cblb*<sup>+/+</sup> group, and a reciprocal increase in tissue-resident monocytes.  
384 Following *i.t.* infection, inflammatory monocytes in both lung and spleen were similar between  
385 both *Cblb*<sup>+/+</sup> and *Cblb*<sup>-/-</sup> groups, except at Wk 18 PI, where we found an increase in *Cblb*<sup>-/-</sup> mice  
386 (**Fig. 7D**). Next, we looked at the expression level of MHC-II (as a measure of activation. The  
387 data suggested that MHC-II levels, reflected by MFI, were significantly lower on inflammatory  
388 monocytes at both Wks 6 and 22 PI in *Cblb*<sup>-/-</sup> groups compared with *Cblb*<sup>+/+</sup> controls (**Fig. 7B**) in  
389 both lung and spleens. Additionally, we measured the ROS production by inflammatory  
390 monocytes *ex vivo*. Our data indicated that *Cblb*<sup>+/+</sup> cells had lesser ROS expression compared  
391 with *Cblb*<sup>-/-</sup> (**Fig7C**). Thus, CBLB negatively regulates the ROS production in inflammatory  
392 monocytes, which was reminiscent of ROS production by BMMs *in vitro* (**Fig. 3G & H**).  
393 Collectively, our data show that inflammatory monocyte activation, but not ROS production, was  
394 inhibited in the absence of CBLB.

395

396

### 397 **Role of CBLB in neutrophils during an NTM infection**

398 The neutrophil responses during mycobacterial diseases is a double-edged sword, and  
399 the contribution to immunity is debated (Lowe et al., 2012; Lyadova, 2017). Here, we assessed  
400 neutrophil responses during NTM infection. First, we examined if the phagocytic ability of  
401 neutrophils was affected by CBLB. Bone-marrow-derived neutrophils (BMN) were incubated  
402 with 5MOI of dsRED<sup>+</sup>MAV104, and analyzed by flow cytometry. At 4hr and 12hr PI, ~50% and  
403 ~90%, respectively, of both *Cblb*<sup>+/+</sup> and *Cblb*<sup>-/-</sup> BMN were dsRED<sup>+</sup> (**Fig. 8A**), suggesting a  
404 minimal role of CBLB for phagocytosis. However, there was a significant increase in activation  
405 status (MFI of CD44<sup>hi</sup>) of *Cblb*<sup>-/-</sup> BMN compared with *Cblb*<sup>+/+</sup> cells (**Fig. 8B**). Next, we

406 evaluated neutrophil numbers *in vivo*. **Fig. 8C** shows the gating of frequencies of neutrophils in  
407 flow plots in the lung and spleen at Wk 22 PI, and found no differences between the groups.  
408 Following *i.v.* infection, neutrophil numbers were significantly reduced at an early time point in  
409 the spleen (Wk 6) in *Cblb*<sup>-/-</sup> mice compared with *Cblb*<sup>+/+</sup> (**Fig. 8E; bottom left panel**). However,  
410 in other time points and in the lungs, CBLB played a minimal role for neutrophil numbers (**Fig.**  
411 **8E; left panels**). Similarly, CBLB was dispensable in regulating the neutrophil numbers  
412 following *i.t.* infection, except that we found a significant difference in the lung at Wk 18 PI.  
413 Next, we asked if neutrophil activation, which may be involved in pathology, was modulated by  
414 CBLB. Interestingly, on the contrary to *in vitro* data, we found significantly lower MFI of CD44  
415 on neutrophils of *Cblb*<sup>-/-</sup> compared with *Cblb*<sup>+/+</sup> mice (**Fig. 8D**). Similarly, we found defect in  
416 activation of neutrophils in the absence of *Cblb* in lung and spleen, following *i.v.* and *i.t.* routes of  
417 infection, respectively (**Supp. Fig. 3A & B**). Collectively, CBLB may be redundant for  
418 neutrophil numbers *in vivo*, but may help maintain the activation status during an NTM infection.

419  
420

#### 421 **Dynamics of eosinophil numbers in the absence of *Cblb* during an NTM infection**

422 Next, we asked if CBLB promotes an inadvertent response that may have affected bacterial  
423 growth and immunity (Kirman et al., 2000; Pfeffer et al., 2017). Following *i.v.* infection, we  
424 observed a significant increase in eosinophil numbers in *Cblb*<sup>-/-</sup> mice compared with *Cblb*<sup>+/+</sup>  
425 group (**Fig. 9A**). Following *i.t.* infection, eosinophil responses were significantly higher in *Cblb*<sup>-/-</sup>  
426 mice compared with *Cblb*<sup>+/+</sup> group at Wk 8PI in the lung, but not during later time points of  
427 infection (**Fig. 9B**). In the spleens, responses were more dynamic, but no significant differences  
428 between *Cblb*<sup>-/-</sup> and *Cblb*<sup>+/+</sup> mice were observed in the later stages of infection (**Fig. 9B**).  
429 Overall, our data suggested that CBLB plays a minimal or negative role in the regulation of  
430 eosinophil numbers following NTM infection.

431  
432

#### 433 **CBLB alters the Plasmacytoid DC numbers during an NTM infection**

434 Although the *in vivo* source of type I IFNs has yet to be clearly defined during NTM infection,  
435 myeloid cells, including plasmacytoid DC (pDC) cells, are known to be significant producers.  
436 Type I IFNs modulate disease pathogenesis and host responses during mycobacterial infection,  
437 both negatively and positively (Donovan et al., 2017; Lu et al., 2017; Moreira-Teixeira et al.,  
438 2018; Parlato et al., 2018). Here, we enumerated the number of plasmacytoid DC during an  
439 NTM infection. Following *i.v.* infection, plasmacytoid DC were significantly lower in the  
440 absence of *Cblb* at both Wks 6 and 12 PI (**Fig. 10B**), but not at a later time point (Wk 22PI; **Fig.**  
441 **10A & B**). However, following *i.t.* infection, plasmacytoid DC were not affected, except at  
442 Wk12 PI, where we found a significant reduction in *Cblb*<sup>-/-</sup> compared with *Cblb*<sup>+/+</sup> mice (**Fig.**  
443 **10C**). Thus, our data suggest an early depletion or inhibition of pDC in the absence of *Cblb*  
444 during systemic infection at earlier time points.

445  
446

#### 447 **CBLB is required for conventional dendritic cell responses during an NTM infection**

448 Next, we evaluated the role of CBLB for conventional DC (cDC) responses, which are necessary  
449 for productive adaptive immunity, and modulation of inflammation during mycobacterial

450 infections (Mihret, 2012; Lai et al., 2018b; Ribechini et al., 2019). We measured the numbers of  
451 cDC in the spleen (both CD8<sup>+</sup>/CD11b<sup>-</sup> and CD8<sup>-</sup>/CD11b<sup>+</sup>), and found that *Cblb*<sup>-/-</sup> mice had  
452 significantly blunted cDC numbers at all the time points compared with *Cblb*<sup>+/+</sup> in (**Fig. 11A &**  
453 **B**). Next, we asked if level of MHC-II, a classical marker for cDC activation, was affected by  
454 CBLB. Similar to the numbers, activation status (MFI of MHC-II) on CD8<sup>+</sup> cDC (cross-  
455 presenting cells), but not on CD8<sup>-</sup> cDC, were significantly reduced in the absence of *Cblb* at  
456 earlier time points of infection (**Fig. 11C**; data not shown). Thus, CBLB helps for robust cDC  
457 responses during an NTM infection.

458  
459

### 460 **Role of CBLB in granulomatous inflammation during an NTM infection**

461 Next, we wanted to determine the effect of CBLB for NTM pathogenesis by histopathology.  
462 Although the beneficial role of granuloma formation for the host defense is debated  
463 (Ramakrishnan, 2012; Silva Miranda et al., 2012; Pagan and Ramakrishnan, 2014), the dogma,  
464 nevertheless, supports for prevention of dissemination (Saunders and Cooper, 2000; Ndlovu and  
465 Marakalala, 2016). We dissected the role of *Cblb* for granulomatous inflammation, orchestrated  
466 by innate immune cells under T-cell deficiency. We harvested tissues following an NTM  
467 infection at Wks 3, 6, 9, and 13, and subjected for histopathological readings. The inflammation,  
468 characterized by small discrete granulomatous foci, was prominent in *Cblb*<sup>+/+</sup> mice at 3-wk PI in  
469 the spleen & liver (**Fig. 12**). Similarly, multiple small indiscrete granulomatous foci were found  
470 in the lungs. In contrast, granulomatous foci were not apparent in the *Cblb*<sup>-/-</sup> mice in any of the  
471 tissues at 3-wk PI and a few at 9-wk PI. However, small discrete granulomatous inflammation  
472 foci were observed at 13-wk PI in all tissues in *Cblb*<sup>-/-</sup> mice (**Fig. 12**). These readings suggest a  
473 delay in the formation of granulomas in the absence of *Cblb*. Many increasing numbers of acid-  
474 fast bacilli, within the cytoplasm of macrophages, were noticed in *Cblb*<sup>-/-</sup> mice compared with  
475 *Cblb*<sup>+/+</sup> starting from 3-wk PI (data not shown) that was reminiscent of CFU readings (**Fig. 2**).  
476 Collectively, our data suggest that CBLB facilitated the early formation of granulomas and  
477 thwarting of dissemination during an NTM infection under T-cell deficiency.

478

479

480

481

482

483

484

485

486

487

488

489

490

## 491 Discussion

492  
493 Host regulators of innate immune responses during NTM infections are not well studied,  
494 including under severe T-cell deficiency. In this study, we systematically evaluated the role of  
495 CBLB for innate immunity and control of bacterial dissemination during an NTM infection in  
496 mice. We found that *Cblb*-deficiency enhanced bacterial growth and dissemination *in vivo*. We  
497 found several altered or defective innate immune cells under CBLB deficiency, including  
498 reduced NK cell numbers, reduced activation/numbers of inflammatory monocytes,  
499 conventional Dendritic Cells, and neutrophils. Notably, our studies showed that CBLB facilitated  
500 the early induction of granulomatous inflammation. Additionally, we showed the induction of  
501 CBLB following NTM infection, and *Cblb*-deficient macrophages were competent to control the  
502 growth of bacteria.

503  
504 Mouse models of NTM infections, especially using C57BL/6 and *M. avium*, suggest that  
505 bacterial pathogenesis can be studied [(Chan ED et al., Mycobact Dis 2016, 6:3); (Verma et al.,  
506 2019)]. Here we define CBLB as an important innate host regulators of NTM infections. Our  
507 study showed that CBLB is necessary for inhibiting NTM growth and dissemination under T-cell  
508 deficiency (**Fig. 2**). To delineate the cellular mechanisms, we sought to determine if CBLB could  
509 be induced in macrophages, primary target cells of mycobacteria, following NTM infection. We  
510 discovered that CBLB was significantly induced in primary macrophages, including splenocytes.  
511 Next, we delineated the role of CBLB for NTM growth in macrophages *in vitro* using BMM, and  
512 found that *Cblb*<sup>-/-</sup> cells were equally competent or superior in inhibiting NTM growth compared  
513 with *Cblb*<sup>+/+</sup> (**Fig. 3**), which may be due to enhanced ROS production (Shastri et al., 2018). Our  
514 *in vitro* immunity (CFU) data was in line with other studies using fungi (Wirnsberger et al.,  
515 2016; Xiao et al., 2016), but was in contrast to recently published report using *M. tuberculosis*  
516 (Penn et al., 2018). The latter study suggested that CBLB was required to sequester LpqN, an  
517 Mtb virulence factor, for enhanced bacterial killing by macrophages. Interestingly, in this study,  
518 lpqN mutant Mtb was still able to grow higher in *Cblb*-deficient macrophages compared with  
519 *Cblb*-sufficient cells. Although utative LpqN family protein is present in *M. avium* (NCBI blast,  
520 sequence ID: EUA40567.1 and Broad institute MAV4561 protein) species, the  
521 lifestyle/pathogenesis of these bacteria may be different in macrophages. Further studies are  
522 warranted to decipher the *in vivo* role of CBLB in macrophages during mycobacterial diseases.

523  
524 NK cells are critical regulators of pathogenesis during mycobacterial, including NTM infections  
525 (Dhiman et al., 2012; Allen et al., 2015; Lai et al., 2018a). Our study showed a significant loss of  
526 NK cells in *Cblb*-deficient mice, especially of CD11b<sup>+</sup> subset. To validate our observations on  
527 the role of CBLB in NK cells *in vivo*, we investigated if NTM infection would affect the  
528 expression of CBLB and its function using *in vitro*. NTM infection did significantly enhance  
529 CBLB levels in NK cells, and as predicted (Liu et al., 2014), *Cblb*<sup>-/-</sup> NK cells produced higher  
530 IFN $\gamma$  compared with *Cblb*<sup>+/+</sup> (**Fig. 5**). Hence, we postulate that impaired NK cell numbers in  
531 *Cblb*-deficient mice may be one of the causes of higher bacterial burden and dissemination. Our  
532 results are in line with the potential beneficial role of NK cells to control NTM infection (Lai et  
533 al., 2018a), and CD11b<sup>+</sup> NK cells may be of superior in functions (Lu et al., 2014; Allen et al.,  
534 2015; Venkatasubramanian et al., 2017; Garand et al., 2018; Lai et al., 2018a). Although the role  
535 of *Cblb*-deficient NK cells during the early phases of infection and their loss during NTM  
536 infection is not known, we think a higher antigen level is the probable cause for their depletion,

537 akin to NKT or T cells (Fuller and Zajac, 2003; Kee et al., 2012). Further studies are required to  
538 determine CBLB-dependent NK cells for control of NTM infection.

539  
540 There is an immense interest in the role of newly recruited monocytes, including inflammatory  
541 monocytes, in the pathogenesis of mycobacterial diseases (Serbina et al., 2008; Marakalala et al.,  
542 2018; Sampath et al., 2018; Davis et al., 2019). Monocytes/macrophages, recently recruited,  
543 expressing CCR2 seem to be highly permissive to *M. tuberculosis* due to their inability to get  
544 activation signals that are masked by phenolic glycolipids decoration on bacteria (Cambier et al.,  
545 2017; Garcia-Vilanova et al., 2019). However, several studies have shown the enhanced  
546 susceptibility under CCR2-deficiency, which may also depend on the virulence of mycobacteria  
547 (Peters et al., 2001; Dunlap et al., 2018; Garcia-Vilanova et al., 2019). Thus, newly recruited  
548 monocytes are critical regulators of pathogenesis and outcome of mycobacterial diseases, and  
549 can be targeted for therapeutic interventions (Norris and Ernst, 2018). Additionally,  
550 monocytes/macrophages can regulate defense against mycobacteria by producing reactive  
551 oxygen/nitrogen species (Lamichhane, 2011), and priming productive T-cell responses (Scott  
552 and Flynn, 2002; Peters et al., 2004; Samstein et al., 2013). In our study, we found a poor  
553 activation (low MHC-II), but higher production of ROS, in *Cblb*-deficient inflammatory  
554 monocytes (**Fig. 7**). However, numbers of inflammatory monocytes were relatively intact, except  
555 in the spleens of IV infected groups, where we found enhanced numbers of non-inflammatory  
556 monocytes. These non-inflammatory monocytes, in a recent study, are classified as Myeloid-  
557 Derived Suppressor Cells, subvert T-cell responses and cause impaired DC response (Abdissa et  
558 al., 2018). We reasoned if CBLB regulates the expression of *CCL2*, a chemokine involved in the  
559 recruitment of monocytes. We found either normal or less *CCL2* expression in infected *Cblb*<sup>-/-</sup>  
560 cells compared with *Cblb*<sup>+/+</sup>, *in vitro* (**Supp. Fig. 4**), suggesting a minimal role of CCL2 for the  
561 abnormal phenotype. Nevertheless, *in vivo* dynamics of CCL2 expression and its role in the  
562 activation of monocytes during NTM infection needs further investigation (Bose and Cho, 2013;  
563 Domingo-Gonzalez et al., 2016). The low MHC-II expression levels on *Cblb*-deficient  
564 inflammatory monocytes may be due to their less differentiation status or commitment into  
565 macrophage/dendritic cell (**Fig. 6B & 11**) lineage under altered micromilieu (Rivollier et al.,  
566 2012; Srivastava et al., 2014; Lastrucci et al., 2015; Sampath et al., 2018). Nevertheless, we  
567 found an enhanced ROS production under *Cblb*-deficiency *in vivo* that recapitulated our *in vitro*  
568 BMM studies (**Fig. 3**), and may, perhaps, be involved in dissemination in the lack of T-cell help  
569 or enhanced cell death (Roca and Ramakrishnan, 2013; Divangahi et al., 2018).

570  
571 Neutrophils play a dichotomous role during mycobacterial infections, and their role for  
572 contributing to immunity or immunopathology is confounded (Lowe et al., 2012; Kroon et al.,  
573 2018). Early recruitment and status of neutrophils seem to dictate their role in the control the  
574 mycobacterial infection, and many studies show the importance of neutrophil function in CGD  
575 patients in defense against active tuberculosis (Martineau et al., 2007; Kulkarni et al., 2016;  
576 Mishra et al., 2017; Wolach et al., 2017; Lowe et al., 2018; Gideon et al., 2019). However,  
577 exuberant neutrophil responses are associated with pathology (Lyadova, 2017). Our data  
578 suggested that phagocytosis of bacteria by neutrophils was not affected by *Cblb*-deficiency.  
579 However, CBLB seems to inhibit the activation of BMN (MFI of CD44) *in vitro*. However, our  
580 *in vivo* studies suggested otherwise, in that, the activation status of neutrophils was significantly

581 less in *Cblb*-deficient mice, but numbers were not affected. Similarly, we did not see significant  
582 differences in the numbers of neutrophils among the groups by histopathology, despite increased  
583 numbers of bacteria in the macrophages of *Cblb*-deficient groups. Although the role of CBLB for  
584 neutrophil functions is understudied, a recent study suggested a minimal effect of CBLB on  
585 neutrophil responses during candida infection (Xiao et al., 2016). Further functional studies are  
586 required to delineate CBLB role in neutrophils during the early phases of NTM infection.  
587 (Appelberg et al., 1995; Lake et al., 2016).

588  
589 Dendritic cells are of diverse types, but we classified them into two major groups in our study.  
590 Plasmacytoid DC- immune modulators with little direct antigen presentation; and conventional  
591 DC- which have a direct impact on adaptive immunity with antigen-presentation or activation  
592 (Mihret, 2012; Parlato et al., 2018). In our study, we found a significant reduction in  
593 plasmacytoid and conventional DC responses under *Cblb*-deficiency. We postulate that defective  
594 DC cells in *Cblb*-deficient mice may have caused the dysfunction of other innate immune cells.  
595 The defective DC responses may be due to lack of Th1 responses (Frasca et al., 2008) and, in the  
596 absence of such, with impaired clearance of bacteria, Th2 polarization may occur (Traynor et al.,  
597 2000; Mendez-Samperio, 2010; Pfeffer et al., 2017). In line with this, we found an exuberant  
598 eosinophil numbers in the absence of *Cblb*. Eosinophil numbers, an indicator of Th2 responses,  
599 were higher in spleens following i.v. infection, especially in later phases. Studies in  
600 mycobacterial diseases suggested a negative role of eosinophils (Pfeffer et al., 2017; Moideen et  
601 al., 2018), and their depletion fostered the immunity, but not prevention of dissemination  
602 (Kirman et al., 2000). We could not explain the differences in the eosinophil numbers following  
603 *i.v./i.t.* routes of infection, but we believe that it may be due to higher CFUs following i.v.  
604 infection.

605  
606 In this study, we have shown that CBLB was necessary for controlling bacterial growth and  
607 dissemination during an NTM infection under compromised T-cell immunity; the deficiency led  
608 to poor or altered status of many innate immune cell subsets, and the lack of early granulomatous  
609 inflammation. Future studies are warranted to uncover the role of CBLB in each innate immune  
610 cell subsets during NTM infection. Collectively, our studies demonstrate that CBLB can be a  
611 target for therapeutic and preventive measures in controlling NTM infections.

612  
613  
614  
615  
616  
617  
618  
619  
620  
621  
622  
623  
624  
625  
626

627 **Acknowledgments**

628

629 We sincerely thank Dr. Howard Steinberg, Dept. of Pathobiological Sciences at the University of  
630 Wisconsin-Madison for some of the histopathological studies, and Dr. Gee W. Lau, Dept. of  
631 Pathobiology at the UIUC for CBLB protein analysis experiments. We thank animal care facility  
632 at the University of Illinois at Urbana-Champaign. We also thank many investigators who have  
633 contributed significantly in the field of NTM or mycobacterial diseases that were missed in  
634 citations.

635

636 **Author Contributions**

637

638 SM and JS designed the experiments, executed, and analyzed the data. HFMA designed,  
639 executed, and analyzed some of the *in vitro* & *in vivo* experiments. TCK executed and analyzed  
640 some *in vitro* experiments. WC designed, executed, and analyzed western blot experiments.  
641 AMT provided the Mycobacterium strains and helped in designing some of the experiments.  
642 MDV analyzed the histopathological data and edited the MS. SGN conceived the project,  
643 designed the experiments, executed and analyzed the data, and wrote the manuscript.

644

645 **Funding**

646

647 The work was supported by Start-up funds, Dept. of Pathobiology, UIUC (SGN) & NIH R21  
648 AI119945 (SGN).

649

650 **Ethics Statement**

651

652 This work was carried in accordance with the protocol approved by IACUC committee at the  
653 University of Illinois at Urbana-Champaign.

654 **Conflict of Interest**

655

656 Authors declare that they do not have any conflict of interest.

657

658

659

660

661

662

663

664

665



## 666 **References**

- 667
- 668 Abdissa, K., Nerlich, A., Beineke, A., Ruangkiattikul, N., Pawar, V., Heise, U., et al. (2018). Presence of  
669 Infected Gr-1(int)CD11b(hi)CD11c(int) Monocytic Myeloid Derived Suppressor Cells Subverts T  
670 Cell Response and Is Associated With Impaired Dendritic Cell Function in Mycobacterium avium-  
671 Infected Mice. *Front Immunol* 9, 2317. doi: 10.3389/fimmu.2018.02317.
- 672 Adjemian, J., Olivier, K.N., Seitz, A.E., Holland, S.M., and Prevots, D.R. (2012). Prevalence of  
673 nontuberculous mycobacterial lung disease in U.S. Medicare beneficiaries. *Am J Respir Crit Care*  
674 *Med* 185(8), 881-886. doi: 10.1164/rccm.201111-2016OC.
- 675 Allen, M., Bailey, C., Cahatol, I., Dodge, L., Yim, J., Kassissa, C., et al. (2015). Mechanisms of Control of  
676 Mycobacterium tuberculosis by NK Cells: Role of Glutathione. *Front Immunol* 6, 508. doi:  
677 10.3389/fimmu.2015.00508.
- 678 Appelberg, R., Castro, A.G., Gomes, S., Pedrosa, J., and Silva, M.T. (1995). Susceptibility of beige mice to  
679 Mycobacterium avium: role of neutrophils. *Infect Immun* 63(9), 3381-3387.
- 680 Arron, J.R., Vologodskaya, M., Wong, B.R., Naramura, M., Kim, N., Gu, H., et al. (2001). A positive  
681 regulatory role for Cbl family proteins in tumor necrosis factor-related activation-induced  
682 cytokine (trance) and CD40L-mediated Akt activation. *J Biol Chem* 276(32), 30011-30017. doi:  
683 10.1074/jbc.M100414200.
- 684 Bachmaier, K., Krawczyk, C., Koziaradzki, I., Kong, Y.Y., Sasaki, T., Oliveira-dos-Santos, A., et al. (2000).  
685 Negative regulation of lymphocyte activation and autoimmunity by the molecular adaptor Cbl-b.  
686 *Nature* 403(6766), 211-216. doi: 10.1038/35003228.
- 687 Bachmaier, K., Toya, S., Gao, X., Triantafyllou, T., Garrean, S., Park, G.Y., et al. (2007). E3 ubiquitin ligase  
688 Cblb regulates the acute inflammatory response underlying lung injury. *Nat Med* 13(8), 920-926.  
689 doi: 10.1038/nm1607.
- 690 Behar, S.M., Divangahi, M., and Remold, H.G. (2010). Evasion of innate immunity by Mycobacterium  
691 tuberculosis: is death an exit strategy? *Nat Rev Microbiol* 8(9), 668-674. doi:  
692 10.1038/nrmicro2387.
- 693 Bose, S., and Cho, J. (2013). Role of chemokine CCL2 and its receptor CCR2 in neurodegenerative  
694 diseases. *Arch Pharm Res* 36(9), 1039-1050. doi: 10.1007/s12272-013-0161-z.
- 695 Cambier, C.J., O'Leary, S.M., O'Sullivan, M.P., Keane, J., and Ramakrishnan, L. (2017). Phenolic Glycolipid  
696 Facilitates Mycobacterial Escape from Microbicidal Tissue-Resident Macrophages. *Immunity*  
697 47(3), 552-565 e554. doi: 10.1016/j.immuni.2017.08.003.
- 698 Chiang, Y.J., Kole, H.K., Brown, K., Naramura, M., Fukuhara, S., Hu, R.J., et al. (2000). Cbl-b regulates the  
699 CD28 dependence of T-cell activation. *Nature* 403(6766), 216-220. doi: 10.1038/35003235.
- 700 Chirino, L.M., Kumar, S., Okumura, M., Sterner, D.E., Mattern, M., Butt, T.R., et al. (2019). TAM receptors  
701 attenuate murine NK-cell responses via E3 ubiquitin ligase Cbl-b. *Eur J Immunol*. doi:  
702 10.1002/eji.201948204.
- 703 Cohen, S.B., Gern, B.H., Delahaye, J.L., Adams, K.N., Plumlee, C.R., Winkler, J.K., et al. (2018). Alveolar  
704 Macrophages Provide an Early Mycobacterium tuberculosis Niche and Initiate Dissemination.  
705 *Cell Host Microbe* 24(3), 439-446 e434. doi: 10.1016/j.chom.2018.08.001.
- 706 Cong, J., and Wei, H. (2019). Natural Killer Cells in the Lungs. *Front Immunol* 10, 1416. doi:  
707 10.3389/fimmu.2019.01416.
- 708 Davis, A.G., Rohlwick, U.K., Proust, A., Figaji, A.A., and Wilkinson, R.J. (2019). The pathogenesis of  
709 tuberculous meningitis. *J Leukoc Biol* 105(2), 267-280. doi: 10.1002/JLB.MR0318-102R.
- 710 DeWan, A.T., Egan, K.B., Hellenbrand, K., Sorrentino, K., Pizzoferrato, N., Walsh, K.M., et al. (2012).  
711 Whole-exome sequencing of a pedigree segregating asthma. *BMC Med Genet* 13, 95. doi:  
712 10.1186/1471-2350-13-95.

- 713 Dhiman, R., Periasamy, S., Barnes, P.F., Jaiswal, A.G., Paidipally, P., Barnes, A.B., et al. (2012). NK1.1+  
714 cells and IL-22 regulate vaccine-induced protective immunity against challenge with  
715 *Mycobacterium tuberculosis*. *J Immunol* 189(2), 897-905. doi: 10.4049/jimmunol.1102833.
- 716 Diel, R., Lipman, M., and Hoefsloot, W. (2018). High mortality in patients with *Mycobacterium avium*  
717 complex lung disease: a systematic review. *BMC Infect Dis* 18(1), 206. doi: 10.1186/s12879-018-  
718 3113-x.
- 719 Divangahi, M., Khan, N., and Kaufmann, E. (2018). Beyond Killing *Mycobacterium tuberculosis*: Disease  
720 Tolerance. *Front Immunol* 9, 2976. doi: 10.3389/fimmu.2018.02976.
- 721 Domingo-Gonzalez, R., Prince, O., Cooper, A., and Khader, S.A. (2016). Cytokines and Chemokines in  
722 *Mycobacterium tuberculosis* Infection. *Microbiol Spectr* 4(5). doi: 10.1128/microbiolspec.TBTB2-  
723 0018-2016.
- 724 Doniz-Padilla, L., Martinez-Jimenez, V., Nino-Moreno, P., Abud-Mendoza, C., Hernandez-Castro, B.,  
725 Gonzalez-Amaro, R., et al. (2011). Expression and function of Cbl-b in T cells from patients with  
726 systemic lupus erythematosus, and detection of the 2126 A/G Cblb gene polymorphism in the  
727 Mexican mestizo population. *Lupus* 20(6), 628-635. doi: 10.1177/0961203310394896.
- 728 Donovan, M.L., Schultz, T.E., Duke, T.J., and Blumenthal, A. (2017). Type I Interferons in the  
729 Pathogenesis of Tuberculosis: Molecular Drivers and Immunological Consequences. *Front*  
730 *Immunol* 8, 1633. doi: 10.3389/fimmu.2017.01633.
- 731 Dorhoi, A., Yermeev, V., Nouailles, G., Weiner, J., 3rd, Jorg, S., Heinemann, E., et al. (2014). Type I IFN  
732 signaling triggers immunopathology in tuberculosis-susceptible mice by modulating lung  
733 phagocyte dynamics. *Eur J Immunol* 44(8), 2380-2393. doi: 10.1002/eji.201344219.
- 734 Dunlap, M.D., Howard, N., Das, S., Scott, N., Ahmed, M., Prince, O., et al. (2018). A novel role for C-C  
735 motif chemokine receptor 2 during infection with hypervirulent *Mycobacterium tuberculosis*.  
736 *Mucosal Immunol* 11(6), 1727-1742. doi: 10.1038/s41385-018-0071-y.
- 737 Frasca, L., Nasso, M., Spensieri, F., Fedele, G., Palazzo, R., Malavasi, F., et al. (2008). IFN-gamma arms  
738 human dendritic cells to perform multiple effector functions. *J Immunol* 180(3), 1471-1481. doi:  
739 10.4049/jimmunol.180.3.1471.
- 740 Fu, B., Tian, Z., and Wei, H. (2014). Subsets of human natural killer cells and their regulatory effects.  
741 *Immunology* 141(4), 483-489. doi: 10.1111/imm.12224.
- 742 Fuller, M.J., and Zajac, A.J. (2003). Ablation of CD8 and CD4 T cell responses by high viral loads. *J*  
743 *Immunol* 170(1), 477-486. doi: 10.4049/jimmunol.170.1.477.
- 744 Garand, M., Goodier, M., Owolabi, O., Donkor, S., Kampmann, B., and Sutherland, J.S. (2018). Functional  
745 and Phenotypic Changes of Natural Killer Cells in Whole Blood during *Mycobacterium*  
746 tuberculosis Infection and Disease. *Front Immunol* 9, 257. doi: 10.3389/fimmu.2018.00257.
- 747 Garcia-Vilanova, A., Chan, J., and Torrelles, J.B. (2019). Underestimated Manipulative Roles of  
748 *Mycobacterium tuberculosis* Cell Envelope Glycolipids During Infection. *Front Immunol* 10, 2909.  
749 doi: 10.3389/fimmu.2019.02909.
- 750 Gideon, H.P., Phuah, J., Junecko, B.A., and Mattila, J.T. (2019). Neutrophils express pro- and anti-  
751 inflammatory cytokines in granulomas from *Mycobacterium tuberculosis*-infected cynomolgus  
752 macaques. *Mucosal Immunol* 12(6), 1370-1381. doi: 10.1038/s41385-019-0195-8.
- 753 Grainger, J.R., Wohlfert, E.A., Fuss, I.J., Bouladoux, N., Askenase, M.H., Legrand, F., et al. (2013).  
754 Inflammatory monocytes regulate pathologic responses to commensals during acute  
755 gastrointestinal infection. *Nat Med* 19(6), 713-721. doi: 10.1038/nm.3189.
- 756 Henkle, E., and Winthrop, K.L. (2015). Nontuberculous mycobacteria infections in immunosuppressed  
757 hosts. *Clin Chest Med* 36(1), 91-99. doi: 10.1016/j.ccm.2014.11.002.
- 758 Heung, L.J., and Hohl, T.M. (2019). Inflammatory monocytes are detrimental to the host immune  
759 response during acute infection with *Cryptococcus neoformans*. *PLoS Pathog* 15(3), e1007627.  
760 doi: 10.1371/journal.ppat.1007627.

- 761 Hey, Y.Y., Quah, B., and O'Neill, H.C. (2017). Antigen presenting capacity of murine splenic myeloid cells.  
762 *BMC Immunol* 18(1), 4. doi: 10.1186/s12865-016-0186-4.
- 763 Horne, D., and Skerrett, S. (2019). Recent advances in nontuberculous mycobacterial lung infections.  
764 *F1000Res* 8. doi: 10.12688/f1000research.20096.1.
- 765 International Multiple Sclerosis Genetics, C., Hafler, D.A., Compston, A., Sawcer, S., Lander, E.S., Daly,  
766 M.J., et al. (2007). Risk alleles for multiple sclerosis identified by a genomewide study. *N Engl J*  
767 *Med* 357(9), 851-862. doi: 10.1056/NEJMoa073493.
- 768 Jeon, M.S., Atfield, A., Venuprasad, K., Krawczyk, C., Sarao, R., Elly, C., et al. (2004). Essential role of the  
769 E3 ubiquitin ligase Cbl-b in T cell anergy induction. *Immunity* 21(2), 167-177. doi:  
770 10.1016/j.immuni.2004.07.013.
- 771 Johnson, M.M., and Odell, J.A. (2014). Nontuberculous mycobacterial pulmonary infections. *J Thorac Dis*  
772 6(3), 210-220. doi: 10.3978/j.issn.2072-1439.2013.12.24.
- 773 Karwacz, K., Bricogne, C., MacDonald, D., Arce, F., Bennett, C.L., Collins, M., et al. (2011). PD-L1 co-  
774 stimulation contributes to ligand-induced T cell receptor down-modulation on CD8+ T cells.  
775 *EMBO Mol Med* 3(10), 581-592. doi: 10.1002/emmm.201100165.
- 776 Kee, S.J., Kwon, Y.S., Park, Y.W., Cho, Y.N., Lee, S.J., Kim, T.J., et al. (2012). Dysfunction of natural killer T  
777 cells in patients with active Mycobacterium tuberculosis infection. *Infect Immun* 80(6), 2100-  
778 2108. doi: 10.1128/IAI.06018-11.
- 779 Kirman, J., Zakaria, Z., McCoy, K., Delahunt, B., and Le Gros, G. (2000). Role of eosinophils in the  
780 pathogenesis of Mycobacterium bovis BCG infection in gamma interferon receptor-deficient  
781 mice. *Infect Immun* 68(5), 2976-2978. doi: 10.1128/iai.68.5.2976-2978.2000.
- 782 Koning, J.J., and Mebius, R.E. (2012). Interdependence of stromal and immune cells for lymph node  
783 function. *Trends Immunol* 33(6), 264-270. doi: 10.1016/j.it.2011.10.006.
- 784 Kosoy, R., Yokoi, N., Seino, S., and Concannon, P. (2004). Polymorphic variation in the CBLB gene in  
785 human type 1 diabetes. *Genes Immun* 5(3), 232-235. doi: 10.1038/sj.gene.6364057.
- 786 Kroon, E.E., Coussens, A.K., Kinnear, C., Orlova, M., Moller, M., Seeger, A., et al. (2018). Neutrophils:  
787 Innate Effectors of TB Resistance? *Front Immunol* 9, 2637. doi: 10.3389/fimmu.2018.02637.
- 788 Kulkarni, M., Desai, M., Gupta, M., Dalvi, A., Taur, P., Terrance, A., et al. (2016). Clinical, Immunological,  
789 and Molecular Findings of Patients with p47(phox) Defect Chronic Granulomatous Disease (CGD)  
790 in Indian Families. *J Clin Immunol* 36(8), 774-784. doi: 10.1007/s10875-016-0333-y.
- 791 Lai, H.C., Chang, C.J., Lin, C.S., Wu, T.R., Hsu, Y.J., Wu, T.S., et al. (2018a). NK Cell-Derived IFN-gamma  
792 Protects against Nontuberculous Mycobacterial Lung Infection. *J Immunol* 201(5), 1478-1490.  
793 doi: 10.4049/jimmunol.1800123.
- 794 Lai, R., Jeyanathan, M., Afkhami, S., Zganiacz, A., Hammill, J.A., Yao, Y., et al. (2018b). CD11b(+) Dendritic  
795 Cell-Mediated Anti-Mycobacterium tuberculosis Th1 Activation Is Counterregulated by CD103(+) Dendritic  
796 Cells via IL-10. *J Immunol* 200(5), 1746-1760. doi: 10.4049/jimmunol.1701109.
- 797 Lake, M.A., Ambrose, L.R., Lipman, M.C., and Lowe, D.M. (2016). "Why me, why now?" Using clinical  
798 immunology and epidemiology to explain who gets nontuberculous mycobacterial infection.  
799 *BMC Med* 14, 54. doi: 10.1186/s12916-016-0606-6.
- 800 Lamichhane, G. (2011). Mycobacterium tuberculosis response to stress from reactive oxygen and  
801 nitrogen species. *Front Microbiol* 2, 176. doi: 10.3389/fmicb.2011.00176.
- 802 Lastrucci, C., Benard, A., Balboa, L., Pingris, K., Souriant, S., Poincloux, R., et al. (2015). Tuberculosis is  
803 associated with expansion of a motile, permissive and immunomodulatory CD16(+) monocyte  
804 population via the IL-10/STAT3 axis. *Cell Res* 25(12), 1333-1351. doi: 10.1038/cr.2015.123.
- 805 Li, D., Gal, I., Vermes, C., Alegre, M.L., Chong, A.S., Chen, L., et al. (2004). Cutting edge: Cbl-b: one of the  
806 key molecules tuning CD28- and CTLA-4-mediated T cell costimulation. *J Immunol* 173(12), 7135-  
807 7139. doi: 10.4049/jimmunol.173.12.7135.

- 808 Li, P., Liu, H.L., Zhang, Z.Q., Lv, X.D., Chang, Y.X., Wang, H.J., et al. (2018). Single nucleotide  
809 polymorphisms of casitas B-lineage lymphoma proto-oncogene-b predict outcomes of patients  
810 with advanced non-small cell lung cancer after first-line platinum based doublet chemotherapy.  
811 *J Thorac Dis* 10(3), 1635-1647. doi: 10.21037/jtd.2018.02.31.
- 812 Liu, L., Wei, Y., and Wei, X. (2017). The Immune Function of Ly6Chi Inflammatory Monocytes During  
813 Infection and Inflammation. *Curr Mol Med* 17(1), 4-12. doi:  
814 10.2174/1566524017666170220102732.
- 815 Liu, Q., Zhou, H., Langdon, W.Y., and Zhang, J. (2014). E3 ubiquitin ligase Cbl-b in innate and adaptive  
816 immunity. *Cell Cycle* 13(12), 1875-1884. doi: 10.4161/cc.29213.
- 817 Loeser, S., Loser, K., Bijker, M.S., Rangachari, M., van der Burg, S.H., Wada, T., et al. (2007). Spontaneous  
818 tumor rejection by cbl-b-deficient CD8+ T cells. *J Exp Med* 204(4), 879-891. doi:  
819 10.1084/jem.20061699.
- 820 Loeser, S., and Penninger, J.M. (2007). Regulation of peripheral T cell tolerance by the E3 ubiquitin ligase  
821 Cbl-b. *Semin Immunol* 19(3), 206-214. doi: 10.1016/j.smim.2007.02.004.
- 822 Lowe, D.M., Demaret, J., Bangani, N., Nakiwala, J.K., Goliath, R., Wilkinson, K.A., et al. (2018). Differential  
823 Effect of Viable Versus Necrotic Neutrophils on Mycobacterium tuberculosis Growth and  
824 Cytokine Induction in Whole Blood. *Front Immunol* 9, 903. doi: 10.3389/fimmu.2018.00903.
- 825 Lowe, D.M., Redford, P.S., Wilkinson, R.J., O'Garra, A., and Martineau, A.R. (2012). Neutrophils in  
826 tuberculosis: friend or foe? *Trends Immunol* 33(1), 14-25. doi: 10.1016/j.it.2011.10.003.
- 827 Lu, C.C., Wu, T.S., Hsu, Y.J., Chang, C.J., Lin, C.S., Chia, J.H., et al. (2014). NK cells kill mycobacteria  
828 directly by releasing perforin and granulysin. *J Leukoc Biol* 96(6), 1119-1129. doi:  
829 10.1189/jlb.4A0713-363RR.
- 830 Lu, Y.B., Xiao, D.Q., Liang, K.D., Zhang, J.A., Wang, W.D., Yu, S.Y., et al. (2017). Profiling dendritic cell  
831 subsets in the patients with active pulmonary tuberculosis. *Mol Immunol* 91, 86-96. doi:  
832 10.1016/j.molimm.2017.08.007.
- 833 Lutz-Nicoladoni, C., Wolf, D., and Sopper, S. (2015). Modulation of Immune Cell Functions by the E3  
834 Ligase Cbl-b. *Front Oncol* 5, 58. doi: 10.3389/fonc.2015.00058.
- 835 Lyadova, I.V. (2017). Neutrophils in Tuberculosis: Heterogeneity Shapes the Way? *Mediators Inflamm*  
836 2017, 8619307. doi: 10.1155/2017/8619307.
- 837 Marakalala, M.J., Martinez, F.O., Pluddemann, A., and Gordon, S. (2018). Macrophage Heterogeneity in  
838 the Immunopathogenesis of Tuberculosis. *Front Microbiol* 9, 1028. doi:  
839 10.3389/fmicb.2018.01028.
- 840 Martineau, A.R., Newton, S.M., Wilkinson, K.A., Kampmann, B., Hall, B.M., Nawroly, N., et al. (2007).  
841 Neutrophil-mediated innate immune resistance to mycobacteria. *J Clin Invest* 117(7), 1988-  
842 1994. doi: 10.1172/JCI31097.
- 843 Mendez-Samperio, P. (2010). Role of interleukin-12 family cytokines in the cellular response to  
844 mycobacterial disease. *Int J Infect Dis* 14(5), e366-371. doi: 10.1016/j.ijid.2009.06.022.
- 845 Mihret, A. (2012). The role of dendritic cells in Mycobacterium tuberculosis infection. *Virulence* 3(7),  
846 654-659. doi: 10.4161/viru.22586.
- 847 Misharin, A.V., Morales-Nebreda, L., Mutlu, G.M., Budinger, G.R., and Perlman, H. (2013). Flow  
848 cytometric analysis of macrophages and dendritic cell subsets in the mouse lung. *Am J Respir*  
849 *Cell Mol Biol* 49(4), 503-510. doi: 10.1165/rcmb.2013-0086MA.
- 850 Mishra, B.B., Lovewell, R.R., Olive, A.J., Zhang, G., Wang, W., Eugenin, E., et al. (2017). Nitric oxide  
851 prevents a pathogen-permissive granulocytic inflammation during tuberculosis. *Nat Microbiol* 2,  
852 17072. doi: 10.1038/nmicrobiol.2017.72.
- 853 Moideen, K., Kumar, N.P., Nair, D., Banurekha, V.V., Bethunaickan, R., and Babu, S. (2018). Heightened  
854 Systemic Levels of Neutrophil and Eosinophil Granular Proteins in Pulmonary Tuberculosis and  
855 Reversal following Treatment. *Infect Immun* 86(6). doi: 10.1128/IAI.00008-18.

- 856 Moreira-Teixeira, L., Mayer-Barber, K., Sher, A., and O'Garra, A. (2018). Type I interferons in  
857 tuberculosis: Foe and occasionally friend. *J Exp Med* 215(5), 1273-1285. doi:  
858 10.1084/jem.20180325.
- 859 Nanjappa, S.G., Mudalagiriappa, S., Fites, J.S., Suresh, M., and Klein, B.S. (2018). CBLB Constrains  
860 Inactivated Vaccine-Induced CD8(+) T Cell Responses and Immunity against Lethal Fungal  
861 Pneumonia. *J Immunol* 201(6), 1717-1726. doi: 10.4049/jimmunol.1701241.
- 862 Ndlovu, H., and Marakalala, M.J. (2016). Granulomas and Inflammation: Host-Directed Therapies for  
863 Tuberculosis. *Front Immunol* 7, 434. doi: 10.3389/fimmu.2016.00434.
- 864 Norris, B.A., and Ernst, J.D. (2018). Mononuclear cell dynamics in M. tuberculosis infection provide  
865 opportunities for therapeutic intervention. *PLoS Pathog* 14(10), e1007154. doi:  
866 10.1371/journal.ppat.1007154.
- 867 Oh, S.Y., Park, J.U., Zheng, T., Kim, Y.K., Wu, F., Cho, S.H., et al. (2011). Cbl-b regulates airway mucosal  
868 tolerance to aeroallergen. *Clin Exp Allergy* 41(3), 434-442. doi: 10.1111/j.1365-  
869 2222.2010.03593.x.
- 870 Pagan, A.J., and Ramakrishnan, L. (2014). Immunity and Immunopathology in the Tuberculous  
871 Granuloma. *Cold Spring Harb Perspect Med* 5(9). doi: 10.1101/cshperspect.a018499.
- 872 Paolino, M., Choidas, A., Wallner, S., Pranjic, B., Uribealago, I., Loeser, S., et al. (2014). The E3 ligase Cbl-  
873 b and TAM receptors regulate cancer metastasis via natural killer cells. *Nature* 507(7493), 508-  
874 512. doi: 10.1038/nature12998.
- 875 Paolino, M., and Penninger, J.M. (2010). Cbl-b in T-cell activation. *Semin Immunopathol* 32(2), 137-148.  
876 doi: 10.1007/s00281-010-0197-9.
- 877 Paolino, M., Thien, C.B., Gruber, T., Hinterleitner, R., Baier, G., Langdon, W.Y., et al. (2011). Essential role  
878 of E3 ubiquitin ligase activity in Cbl-b-regulated T cell functions. *J Immunol* 186(4), 2138-2147.  
879 doi: 10.4049/jimmunol.1003390.
- 880 Parlato, S., Chiacchio, T., Salerno, D., Petrone, L., Castiello, L., Romagnoli, G., et al. (2018). Impaired IFN-  
881 alpha-mediated signal in dendritic cells differentiates active from latent tuberculosis. *PLoS One*  
882 13(1), e0189477. doi: 10.1371/journal.pone.0189477.
- 883 Payne, F., Cooper, J.D., Walker, N.M., Lam, A.C., Smink, L.J., Nutland, S., et al. (2007). Interaction analysis  
884 of the CBLB and CTLA4 genes in type 1 diabetes. *J Leukoc Biol* 81(3), 581-583. doi:  
885 10.1189/jlb.0906577.
- 886 Penn, B.H., Netter, Z., Johnson, J.R., Von Dollen, J., Jang, G.M., Johnson, T., et al. (2018). An Mtb-Human  
887 Protein-Protein Interaction Map Identifies a Switch between Host Antiviral and Antibacterial  
888 Responses. *Mol Cell* 71(4), 637-648 e635. doi: 10.1016/j.molcel.2018.07.010.
- 889 Perez, B., Mechinaud, F., Galambrun, C., Ben Romdhane, N., Isidor, B., Philip, N., et al. (2010). Germline  
890 mutations of the CBL gene define a new genetic syndrome with predisposition to juvenile  
891 myelomonocytic leukaemia. *J Med Genet* 47(10), 686-691. doi: 10.1136/jmg.2010.076836.
- 892 Peters, W., Cyster, J.G., Mack, M., Schlondorff, D., Wolf, A.J., Ernst, J.D., et al. (2004). CCR2-dependent  
893 trafficking of F4/80dim macrophages and CD11cdim/intermediate dendritic cells is crucial for T  
894 cell recruitment to lungs infected with Mycobacterium tuberculosis. *J Immunol* 172(12), 7647-  
895 7653. doi: 10.4049/jimmunol.172.12.7647.
- 896 Peters, W., Scott, H.M., Chambers, H.F., Flynn, J.L., Charo, I.F., and Ernst, J.D. (2001). Chemokine  
897 receptor 2 serves an early and essential role in resistance to Mycobacterium tuberculosis. *Proc*  
898 *Natl Acad Sci U S A* 98(14), 7958-7963. doi: 10.1073/pnas.131207398.
- 899 Pfeiffer, P.E., Hopkins, S., Cropley, I., Lowe, D.M., and Lipman, M. (2017). An association between  
900 pulmonary Mycobacterium avium-intracellulare complex infections and biomarkers of Th2-type  
901 inflammation. *Respir Res* 18(1), 93. doi: 10.1186/s12931-017-0579-9.

- 902 Prevots, D.R., Loddenkemper, R., Sotgiu, G., and Migliori, G.B. (2017). Nontuberculous mycobacterial  
903 pulmonary disease: an increasing burden with substantial costs. *Eur Respir J* 49(4). doi:  
904 10.1183/13993003.00374-2017.
- 905 Ramakrishnan, L. (2012). Revisiting the role of the granuloma in tuberculosis. *Nat Rev Immunol* 12(5),  
906 352-366. doi: 10.1038/nri3211.
- 907 Ratnatunga, C.N., Lutzky, V.P., Kupz, A., Doolan, D.L., Reid, D.W., Field, M., et al. (2020). The Rise of Non-  
908 Tuberculosis Mycobacterial Lung Disease. *Front Immunol* 11, 303. doi:  
909 10.3389/fimmu.2020.00303.
- 910 Ribechini, E., Eckert, I., Beilhack, A., Du Plessis, N., Walzl, G., Schleicher, U., et al. (2019). Heat-killed  
911 Mycobacterium tuberculosis prime-boost vaccination induces myeloid-derived suppressor cells  
912 with spleen dendritic cell-killing capability. *JCI Insight* 5. doi: 10.1172/jci.insight.128664.
- 913 Rivollier, A., He, J., Kole, A., Valatas, V., and Kelsall, B.L. (2012). Inflammation switches the differentiation  
914 program of Ly6Chi monocytes from antiinflammatory macrophages to inflammatory dendritic  
915 cells in the colon. *J Exp Med* 209(1), 139-155. doi: 10.1084/jem.20101387.
- 916 Roca, F.J., and Ramakrishnan, L. (2013). TNF dually mediates resistance and susceptibility to  
917 mycobacteria via mitochondrial reactive oxygen species. *Cell* 153(3), 521-534. doi:  
918 10.1016/j.cell.2013.03.022.
- 919 Russell, D.G., Cardona, P.J., Kim, M.J., Allain, S., and Altare, F. (2009). Foamy macrophages and the  
920 progression of the human tuberculosis granuloma. *Nat Immunol* 10(9), 943-948. doi:  
921 10.1038/ni.1781.
- 922 Ruth, M.M., and van Ingen, J. (2017). New insights in the treatment of nontuberculous mycobacterial  
923 pulmonary disease. *Future Microbiol* 12, 1109-1112. doi: 10.2217/fmb-2017-0144.
- 924 Sampath, P., Moideen, K., Ranganathan, U.D., and Bethunaickan, R. (2018). Monocyte Subsets:  
925 Phenotypes and Function in Tuberculosis Infection. *Front Immunol* 9, 1726. doi:  
926 10.3389/fimmu.2018.01726.
- 927 Samstein, M., Schreiber, H.A., Leiner, I.M., Susac, B., Glickman, M.S., and Pamer, E.G. (2013). Essential  
928 yet limited role for CCR2(+) inflammatory monocytes during Mycobacterium tuberculosis-  
929 specific T cell priming. *Elife* 2, e01086. doi: 10.7554/eLife.01086.
- 930 Sanna, S., Pitzalis, M., Zoledziewska, M., Zara, I., Sidore, C., Murru, R., et al. (2010). Variants within the  
931 immunoregulatory CBLB gene are associated with multiple sclerosis. *Nat Genet* 42(6), 495-497.  
932 doi: 10.1038/ng.584.
- 933 Saunders, B.M., and Cooper, A.M. (2000). Restraining mycobacteria: role of granulomas in mycobacterial  
934 infections. *Immunol Cell Biol* 78(4), 334-341. doi: 10.1046/j.1440-1711.2000.00933.x.
- 935 Scott, H.M., and Flynn, J.L. (2002). Mycobacterium tuberculosis in chemokine receptor 2-deficient mice:  
936 influence of dose on disease progression. *Infect Immun* 70(11), 5946-5954. doi:  
937 10.1128/iai.70.11.5946-5954.2002.
- 938 Serbina, N.V., Jia, T., Hohl, T.M., and Pamer, E.G. (2008). Monocyte-mediated defense against microbial  
939 pathogens. *Annu Rev Immunol* 26, 421-452. doi: 10.1146/annurev.immunol.26.021607.090326.
- 940 Shastri, M.D., Shukla, S.D., Chong, W.C., Dua, K., Peterson, G.M., Patel, R.P., et al. (2018). Role of  
941 Oxidative Stress in the Pathology and Management of Human Tuberculosis. *Oxid Med Cell*  
942 *Longev* 2018, 7695364. doi: 10.1155/2018/7695364.
- 943 Shi, C., and Pamer, E.G. (2011). Monocyte recruitment during infection and inflammation. *Nat Rev*  
944 *Immunol* 11(11), 762-774. doi: 10.1038/nri3070.
- 945 Silva Miranda, M., Breiman, A., Allain, S., Deknuydt, F., and Altare, F. (2012). The tuberculous granuloma:  
946 an unsuccessful host defence mechanism providing a safety shelter for the bacteria? *Clin Dev*  
947 *Immunol* 2012, 139127. doi: 10.1155/2012/139127.

- 948 Singh, T.P., Vieyra-Garcia, P.A., Wagner, K., Penninger, J., and Wolf, P. (2018). Cbl-b deficiency provides  
949 protection against UVB-induced skin damage by modulating inflammatory gene signature. *Cell*  
950 *Death Dis* 9(8), 835. doi: 10.1038/s41419-018-0858-5.
- 951 Spaulding, A.B., Lai, Y.L., Zelazny, A.M., Olivier, K.N., Kadri, S.S., Prevots, D.R., et al. (2017). Geographic  
952 Distribution of Nontuberculous Mycobacterial Species Identified among Clinical Isolates in the  
953 United States, 2009-2013. *Ann Am Thorac Soc* 14(11), 1655-1661. doi:  
954 10.1513/AnnalsATS.201611-860OC.
- 955 Srivastava, S., Ernst, J.D., and Desvignes, L. (2014). Beyond macrophages: the diversity of mononuclear  
956 cells in tuberculosis. *Immunol Rev* 262(1), 179-192. doi: 10.1111/imr.12217.
- 957 Sturner, K.H., Borgmeyer, U., Schulze, C., Pless, O., and Martin, R. (2014). A multiple sclerosis-associated  
958 variant of CBLB links genetic risk with type I IFN function. *J Immunol* 193(9), 4439-4447. doi:  
959 10.4049/jimmunol.1303077.
- 960 Swamydas, M., and Lionakis, M.S. (2013). Isolation, purification and labeling of mouse bone marrow  
961 neutrophils for functional studies and adoptive transfer experiments. *J Vis Exp* (77), e50586. doi:  
962 10.3791/50586.
- 963 Tang, R., Langdon, W.Y., and Zhang, J. (2019). Regulation of immune responses by E3 ubiquitin ligase  
964 Cbl-b. *Cell Immunol* 340, 103878. doi: 10.1016/j.cellimm.2018.11.002.
- 965 Traynor, T.R., Kuziel, W.A., Toews, G.B., and Huffnagle, G.B. (2000). CCR2 expression determines T1  
966 versus T2 polarization during pulmonary *Cryptococcus neoformans* infection. *J Immunol* 164(4),  
967 2021-2027. doi: 10.4049/jimmunol.164.4.2021.
- 968 Venkatasubramanian, S., Cheekatla, S., Paidipally, P., Tripathi, D., Welch, E., Tvinnereim, A.R., et al.  
969 (2017). IL-21-dependent expansion of memory-like NK cells enhances protective immune  
970 responses against *Mycobacterium tuberculosis*. *Mucosal Immunol* 10(4), 1031-1042. doi:  
971 10.1038/mi.2016.105.
- 972 Verma, D., Stapleton, M., Gadwa, J., Vongtongsalee, K., Schenkel, A.R., Chan, E.D., et al. (2019).  
973 *Mycobacterium avium* Infection in a C3HeB/FeJ Mouse Model. *Front Microbiol* 10, 693. doi:  
974 10.3389/fmicb.2019.00693.
- 975 Wallner, S., Lutz-Nicoladoni, C., Tripp, C.H., Gastl, G., Baier, G., Penninger, J.M., et al. (2013). The role of  
976 the e3 ligase cbl-B in murine dendritic cells. *PLoS One* 8(6), e65178. doi:  
977 10.1371/journal.pone.0065178.
- 978 Winthrop, K.L., Marras, T.K., Adjemian, J., Zhang, H., Wang, P., and Zhang, Q. (2019). Incidence and  
979 Prevalence of Nontuberculous Mycobacterial Lung Disease in a Large United States Managed  
980 Care Health Plan, 2008-2015. *Ann Am Thorac Soc*. doi: 10.1513/AnnalsATS.201804-236OC.
- 981 Wirnsberger, G., Zwolanek, F., Asaoka, T., Kozieradzki, I., Tortola, L., Wimmer, R.A., et al. (2016).  
982 Inhibition of CBLB protects from lethal *Candida albicans* sepsis. *Nat Med* 22(8), 915-923. doi:  
983 10.1038/nm.4134.
- 984 Wolach, B., Gavrieli, R., de Boer, M., van Leeuwen, K., Berger-Achituv, S., Stauber, T., et al. (2017).  
985 Chronic granulomatous disease: Clinical, functional, molecular, and genetic studies. The Israeli  
986 experience with 84 patients. *Am J Hematol* 92(1), 28-36. doi: 10.1002/ajh.24573.
- 987 Xiao, Y., Tang, J., Guo, H., Zhao, Y., Tang, R., Ouyang, S., et al. (2016). Targeting CBLB as a potential  
988 therapeutic approach for disseminated candidiasis. *Nat Med* 22(8), 906-914. doi:  
989 10.1038/nm.4141.
- 990 Yasuda, T., Tezuka, T., Maeda, A., Inazu, T., Yamanashi, Y., Gu, H., et al. (2002). Cbl-b positively regulates  
991 Btk-mediated activation of phospholipase C-gamma2 in B cells. *J Exp Med* 196(1), 51-63. doi:  
992 10.1084/jem.20020068.
- 993 Zhu, L.L., Luo, T.M., Xu, X., Guo, Y.H., Zhao, X.Q., Wang, T.T., et al. (2016). E3 ubiquitin ligase Cbl-b  
994 negatively regulates C-type lectin receptor-mediated antifungal innate immunity. *J Exp Med*  
995 213(8), 1555-1570. doi: 10.1084/jem.20151932.

996 **FIGURE LEGENDS**

997

998 **Figure 1:** Cblb induction and quantification. mRNA/protein levels of CBLB was measured in  
999 naïve or infected cells & tissues by western blotting (**A**; uninfected & **D**; 5 MOI;  $\sim 1 \times 10^6$  cells),  
1000 flow cytometry (**A**; uninfected, **C and D**; 5 MOI,  $> 1 \times 10^5$  cells @24-48hr post-infection, PI) and  
1001 qPCR (**B**, pooled data from 2 experiments @24hr PI, 5MOI,  $> 1 \times 10^6$  cells). Data is representative  
1002 of at least two independent experiments. N=4-6 replicates for qPCR, and 4-5 mice for flow  
1003 cytometry. Pooled samples were used for western blotting. Values are mean  $\pm$  SD. \* $p \leq 0.05$ ,  
1004 \*\* $p \leq 0.01$ , \*\*\* $p \leq 0.001$ , and \*\*\*\* $p \leq 0.0001$ . MFI=Mean Fluorescence Intensity. The cells/tissues  
1005 were from both OT-I Tg/KO or WT/KO background mice.

1006

1007 **Figure 2:** Cblb-deficiency promotes NTM dissemination in mice. Six to eight-wk-old OTI-Tg-  
1008 Cblb<sup>+/+</sup> (Cblb<sup>+/+</sup>) and OTI-Tg-Cblb<sup>-/-</sup> (Cblb<sup>-/-</sup>) mice were infected either intravenously (I.V.; **A**)  
1009 or intratracheally (I.T.; **B**) as described in Methods. At indicated week PI, tissues were harvested  
1010 and bacterial loads were quantified. IV infection data is representative of 2-3 experiments.  
1011 Values are mean  $\pm$  SD. N=3-6 mice/group. \* $p \leq 0.05$ , \*\* $p \leq 0.01$ , \*\*\* $p \leq 0.001$ , and \*\*\*\* $p \leq 0.0001$ .

1012

1013 **Figure 3:** CBLB hinders NTM growth in Bone-Marrow Derived Macrophages (BMM) *in vitro*.  
1014 Plated BMM cells, either from Tg or WT –background, were infected with MAV104, and at 4hr  
1015 post-infection, wells were washed to remove non-adherent/extracellular bacteria. On indicated  
1016 post-infection days, seeded cells (**A**,  $\sim 1 \times 10^6$  cells; **B**,  $\sim 3.5 \times 10^5$  cells; & **C**,  $2 \times 10^5$  cells) were  
1017 lysed with 1% Triton X-100 and CFUs were enumerated on 7H10 agar plates. Data is of 4-  
1018 replicates/experiment from at least two-independent experiments. After 4hr post-infection, rate  
1019 of phagocytosis (% dsRED<sup>+</sup>; **D**), MHC-II (**E**), and CellROX (**F**) expression in BMM cells were  
1020 analyzed by flow cytometry. (**G**) Plated infected BMM were washed after 48hr, stained with  
1021 dyes, and analyzed by confocal microscopy. The ROS levels (**H**) were quantified using Image J  
1022 software (NIH). Images are representative of 10-fields/experiment of 2-3 independent  
1023 experiments.

1024

1025 **Figure 4:** Gating strategy to analyze various innate immune cells by flow cytometry. Mice were  
1026 infected as described in Fig. 2. Single-cell suspensions from the lung and spleens were stained  
1027 with fluorochrome-conjugated antibodies and were analyzed by flow cytometry. The figure  
1028 shows the gating strategy to analyze various innate immune cells and the derivatives for  
1029 calculation of their frequencies in the lung (**A**) and spleen (**B**; after NK cell gating). The  
1030 frequencies calculated were on among their immediate parent populations in following figures.

1031 **Figure 5:** NK cell responses in the absence of Cblb. **A & B.** Splenocytes from both OT-I Tg/KO  
1032 or WT/KO background mice were infected with 5 MOI of MAV104. At 48hr PI, CBLB  
1033 induction and % cytokine production by NK cells were analyzed by flow cytometry (N=4-6  
1034 replicates and data is representative of 3 independent experiments). **C-E.** Cblb<sup>+/+</sup> and Cblb<sup>-/-</sup> mice  
1035 were infected as described in Fig. 2. At indicated week PI, tissues were harvested, single-cell  
1036 suspensions were stained for NK cells (CD90<sup>-</sup>, CD11b<sup>+/+</sup> NK1.1<sup>+</sup>) using fluorochrome-  
1037 conjugated antibodies, and analyzed by flow cytometry. **C.** Dot plots show the percent of cells. **D**  
1038 & **E.** Bar diagrams show the frequencies of NK cells. IV infection data is representative of 2-3



1039 independent experiments. Values are mean  $\pm$  SD. N=3-6 mice/group. \* $p \leq 0.05$ , \*\* $p \leq 0.01$ ,  
1040 \*\*\* $p \leq 0.001$ , and \*\*\*\* $p \leq 0.0001$ .

1041

1042 **Figure 6:** Alveolar Macrophage numbers in the absence of *Cblb*. Mice were infected as  
1043 described in Fig. 2. At indicated week PI, tissues were harvested, single-cell suspensions were  
1044 stained for alveolar macrophages (CD90<sup>-</sup>, Ly6G<sup>-</sup>, NK1.1<sup>-</sup>, CD11b<sup>-</sup>, CD11c<sup>+</sup>, Siglec-F/CD64<sup>+</sup>)  
1045 using fluorochrome-conjugated antibodies, and analyzed by flow cytometry. **A.** Dot plots show  
1046 percent Alveolar Macrophages. **B & C.** Bar diagrams show the frequencies of Alveolar  
1047 Macrophages in the lung of mice infected by I.V. and I.T. routes, respectively. Values are mean  
1048  $\pm$  SD. N=3-6 mice/group. IV infection data is representative of 2-3 independent experiments.  
1049 \* $p \leq 0.05$  and \*\* $p \leq 0.01$ .

1050

1051 **Figure 7:** Abnormal Monocytes responses under *Cblb*-deficiency. *Cblb*<sup>+/+</sup> and *Cblb*<sup>-/-</sup> mice were  
1052 infected as described in Fig. 2. At indicated week PI, tissues were harvested, single-cell  
1053 suspensions were stained for Inflammatory/Resident Monocytes (CD90<sup>-</sup>, Ly6G<sup>-</sup>, NK1.1<sup>-</sup>,  
1054 CD11b<sup>+</sup>, Siglec-F<sup>-</sup>, Ly6C<sup>hi/+</sup>, respectively) using fluorochrome-conjugated antibodies, and  
1055 analyzed by flow cytometry. **(A).** Plots show the percent of Inflammatory or Resident  
1056 Monocytes. **B.** MFI of MHC-II expression. **(C).** MFI of CellROX (pooled or individual mouse  
1057 samples). **(D)** Frequencies of inflammatory monocytes. Values are mean  $\pm$  SD. N=3-6  
1058 mice/group. IV infection data is representative of 2-3 independent experiments. \* $p \leq 0.05$ ,  
1059 \*\* $p \leq 0.01$ , \*\*\* $p \leq 0.001$ , and \*\*\*\* $p \leq 0.001$ .

1060

1061 **Figure 8:** Neutrophil responses under *Cblb*-deficiency. **A & B.** Bone marrow-derived  
1062 neutrophils (BMN) were infected with 5MOI of dsRED<sup>+</sup>MAV104. At indicated time points, rate  
1063 of phagocytosis (% dsRED<sup>+</sup>ve; **A**) and activation (MFI of CD44; **B**) of neutrophils were analyzed  
1064 by flow cytometry. **(C-E)** Mice were infected as described in Fig. 2. At indicated week PI,  
1065 tissues were harvested, single-cell suspensions were stained for Neutrophils (CD90<sup>-</sup>, Ly6G<sup>+</sup>,  
1066 CD11b<sup>+</sup>, NK1.1<sup>-</sup>) using fluorochrome-conjugated antibodies, and analyzed by flow cytometry.  
1067 Dot plots **(C)** and Bar diagrams **(E)** show the percent of cells. **D.** Bar diagrams show the MFI of  
1068 CD44 expression. IV infection data is representative of 2-3 independent experiments. Values are  
1069 mean  $\pm$  SD. N=3-6 mice/group. \* $p \leq 0.05$ , \*\* $p \leq 0.01$ , \*\*\* $p \leq 0.001$  and \*\*\*\* $p \leq 0.0001$ .

1070

1071 **Figure 9:** Eosinophil numbers in the absence of *Cblb*. Mice were infected as described in Fig. 2.  
1072 At indicated week PI, tissues were harvested, single-cell suspensions were stained for  
1073 Eosinophils (CD90<sup>-</sup>, Ly6G<sup>-</sup>, NK1.1<sup>-</sup>, CD11c<sup>-</sup>, CD11b<sup>+</sup>, Siglec-F<sup>+</sup>) using fluorochrome-  
1074 conjugated antibodies, and analyzed by flow cytometry. **A.** Plots show the percent of cells  
1075 following IV infection. **B.** Bar diagrams show the frequencies of eosinophils in the lung and  
1076 spleens of mice infected by I.T. route. IV infection data is representative of 2 independent  
1077 experiments. Values are mean  $\pm$  SD. N=3-6 mice/group. \* $p \leq 0.05$ , \*\* $p \leq 0.01$ , and \*\*\* $p \leq 0.001$ .

1078

1079 **Figure 10:** Plasmacytoid DC numbers under *Cblb*-deficiency. *Cblb*<sup>+/+</sup> and *Cblb*<sup>-/-</sup> mice were  
1080 infected as described in Fig. 2. At indicated week PI, tissues were harvested, single-cell  
1081 suspensions were stained for Plasmacytoid DC (CD90<sup>-</sup>, Ly6G<sup>-</sup>, NK1.1<sup>-</sup>, CD11c<sup>-</sup>, CD11b<sup>-</sup>,  
1082 Ly6C<sup>+</sup>) using fluorochrome-conjugated antibodies, and analyzed by flow cytometry. **A.** Dot plots  
1083 show the percent of cells. **B & C.** Bar diagrams show the frequencies of plasmacytoid DC in the  
1084 lung and spleens of mice infected by I.V. and I.T. routes, respectively. IV infection data is

1085 representative of 2-3 independent experiments. Values are mean  $\pm$  SD. N=3-6 mice/group.  
1086 \* $p \leq 0.05$ , \*\* $p \leq 0.01$ , and \*\*\*\* $p \leq 0.0001$ .

1087  
1088 **Figure 11:** Conventional DC responses in *Cblb*-deficient mice. *Cblb*<sup>+/+</sup> and *Cblb*<sup>-/-</sup> mice were i.v.  
1089 infected as described in Fig. 2. At indicated week PI, spleens were harvested, single-cell  
1090 suspensions were stained for cDC (CD90<sup>-</sup>, Ly6G<sup>-</sup>, NK1.1<sup>-</sup>, MHC-II<sup>+</sup>, CD11b<sup>+/-</sup>) using  
1091 fluorochrome-conjugated antibodies, and analyzed by flow cytometry. **A.** Dot plots show the  
1092 percent of cells. **B & C.** Bar diagrams show the frequencies of plasmacytoid DC. The data is  
1093 representative of 2-3 independent experiments. Values are mean  $\pm$  SD. N=3-6 mice/group.  
1094 \* $p \leq 0.05$ , \*\* $p \leq 0.01$ , and \*\*\* $p \leq 0.001$ .

1095  
1096 **Figure 12:** Histopathology of infected tissues. *Cblb*<sup>+/+</sup> and *Cblb*<sup>-/-</sup> mice were infected as  
1097 described in Fig. 2 by i.v. route. At indicated week PI, tissues were harvested in 10% buffered  
1098 Neutral Formalin. Tissues were paraffin embedded, sectioned and mounted on the slides to stain  
1099 with Hematoxylin and Eosin (H&E). The multiple samples were read at multiple foci for  
1100 histopathological readouts, and representative photomicrographs of granulomatous inflammatory  
1101 foci (asterisks) are shown here. Bar=50 $\mu$ m (Liver and Spleen), and 100 $\mu$ m (Lung). N=5-6  
1102 mice/group. Data is from 2-3 independent experiments.

1103  
1104  
1105  
1106  
1107  
1108  
1109  
1110  
1111  
1112  
1113  
1114  
1115  
1116  
1117  
1118  
1119  
1120  
1121  
1122  
1123  
1124  
1125  
1126  
1127  
1128  
1129  
1130

**Figure 1.****A.**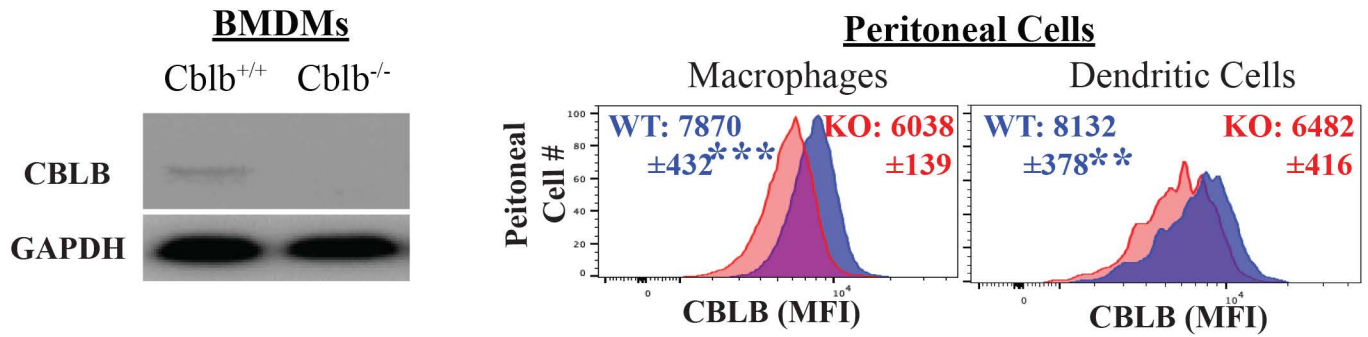**B.**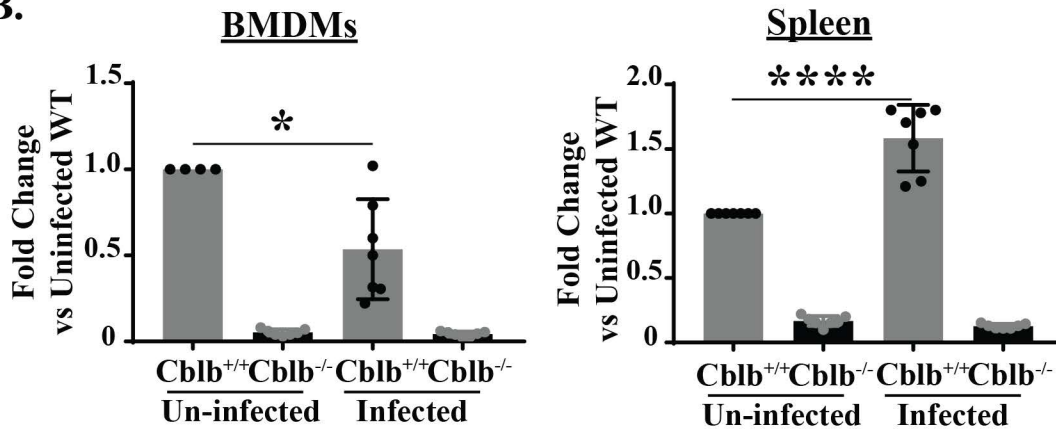**C.**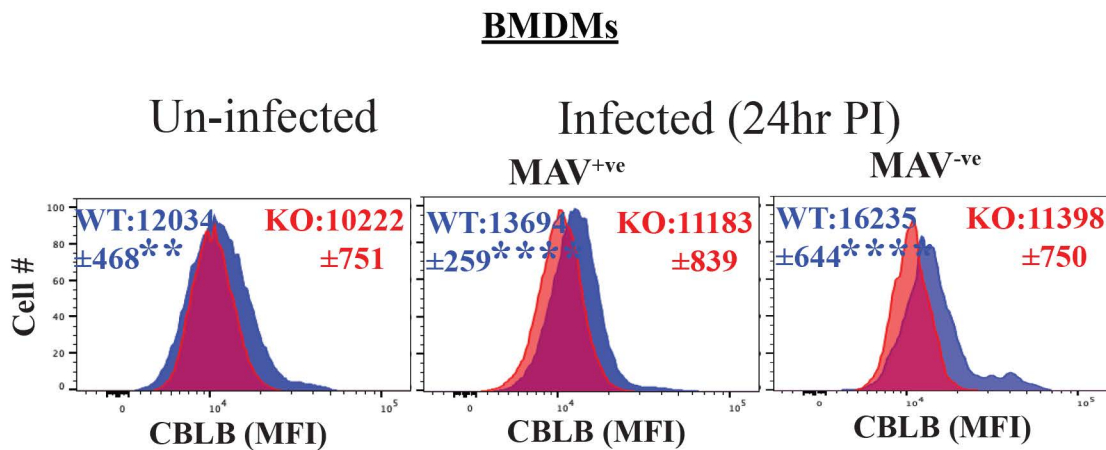**D.**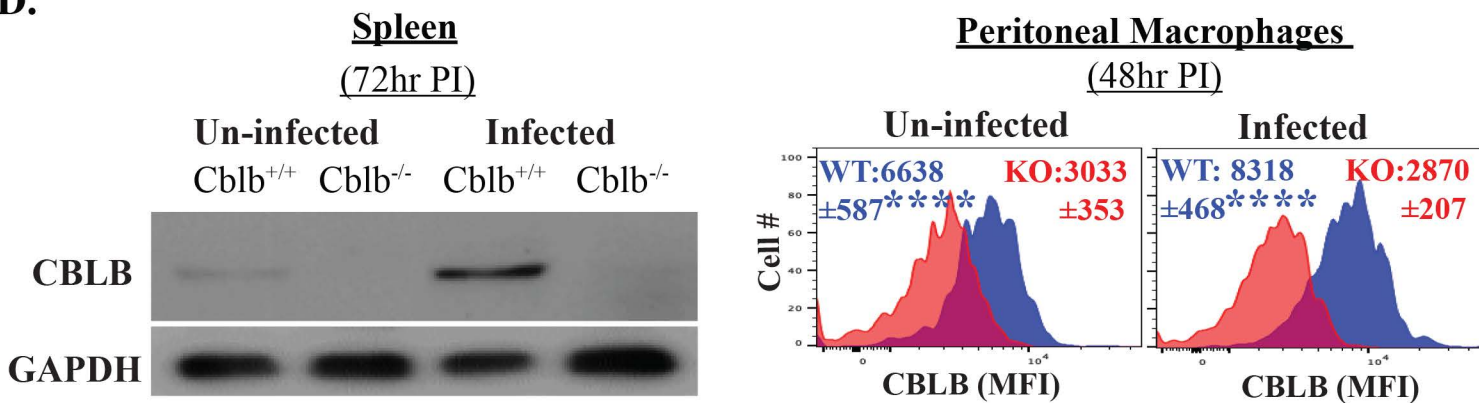

**Figure 2.**

**A.**

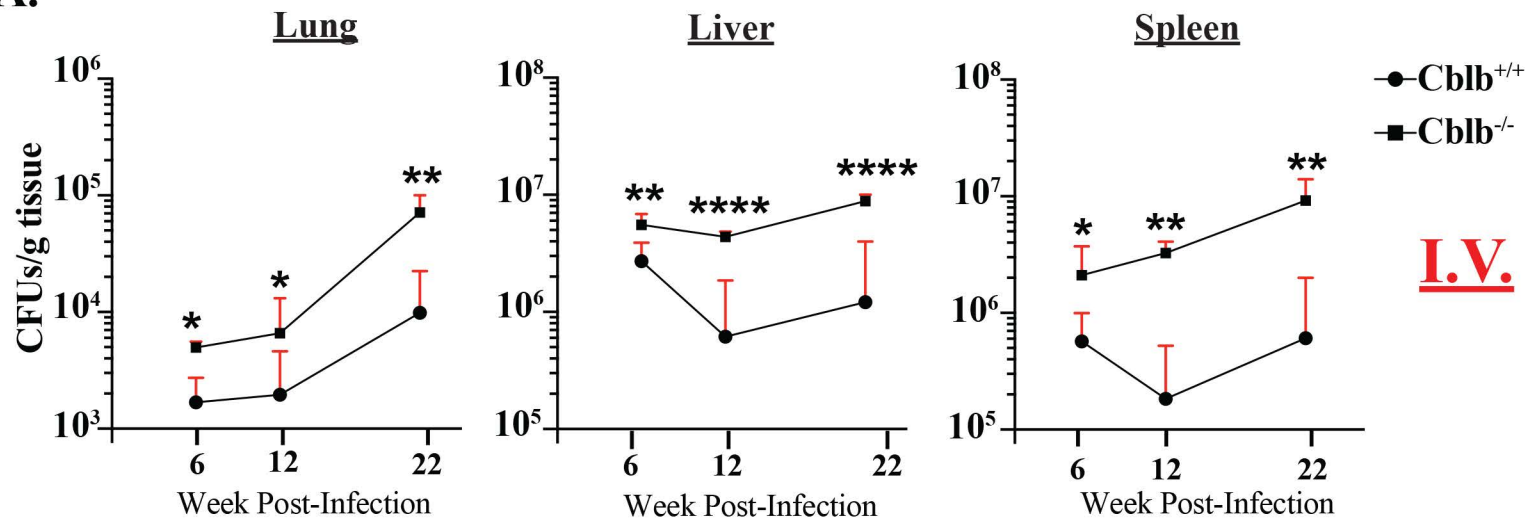

**B.**

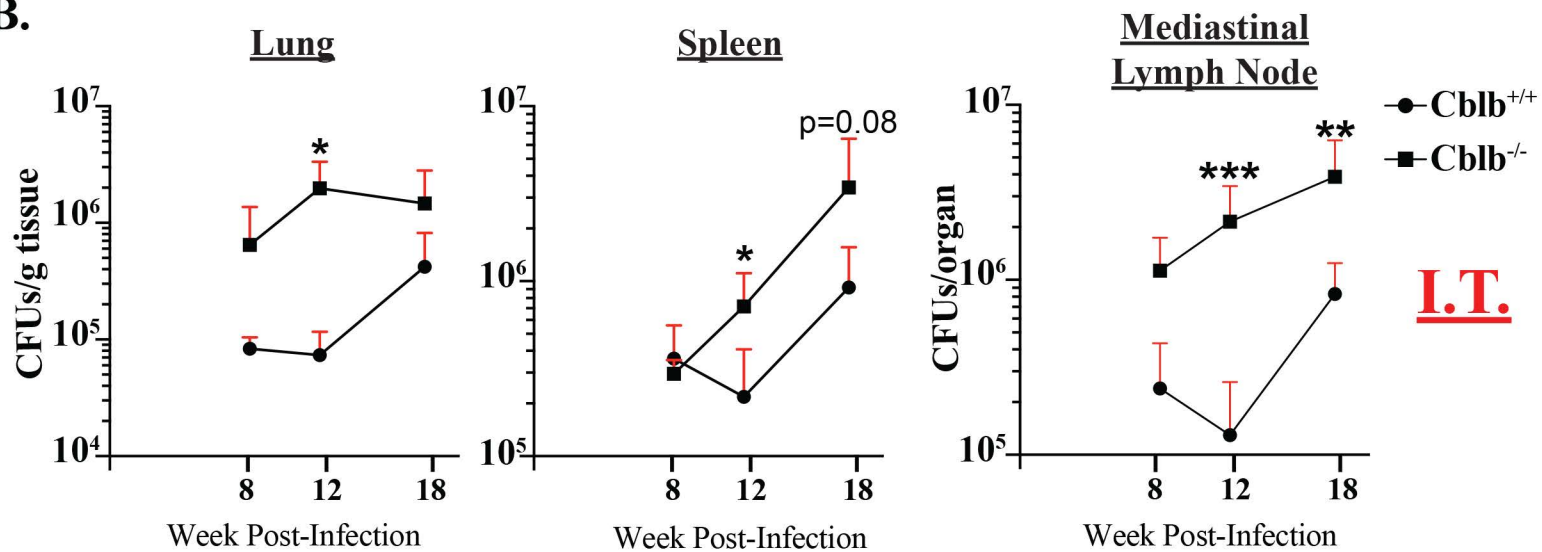

**Figure 3.**

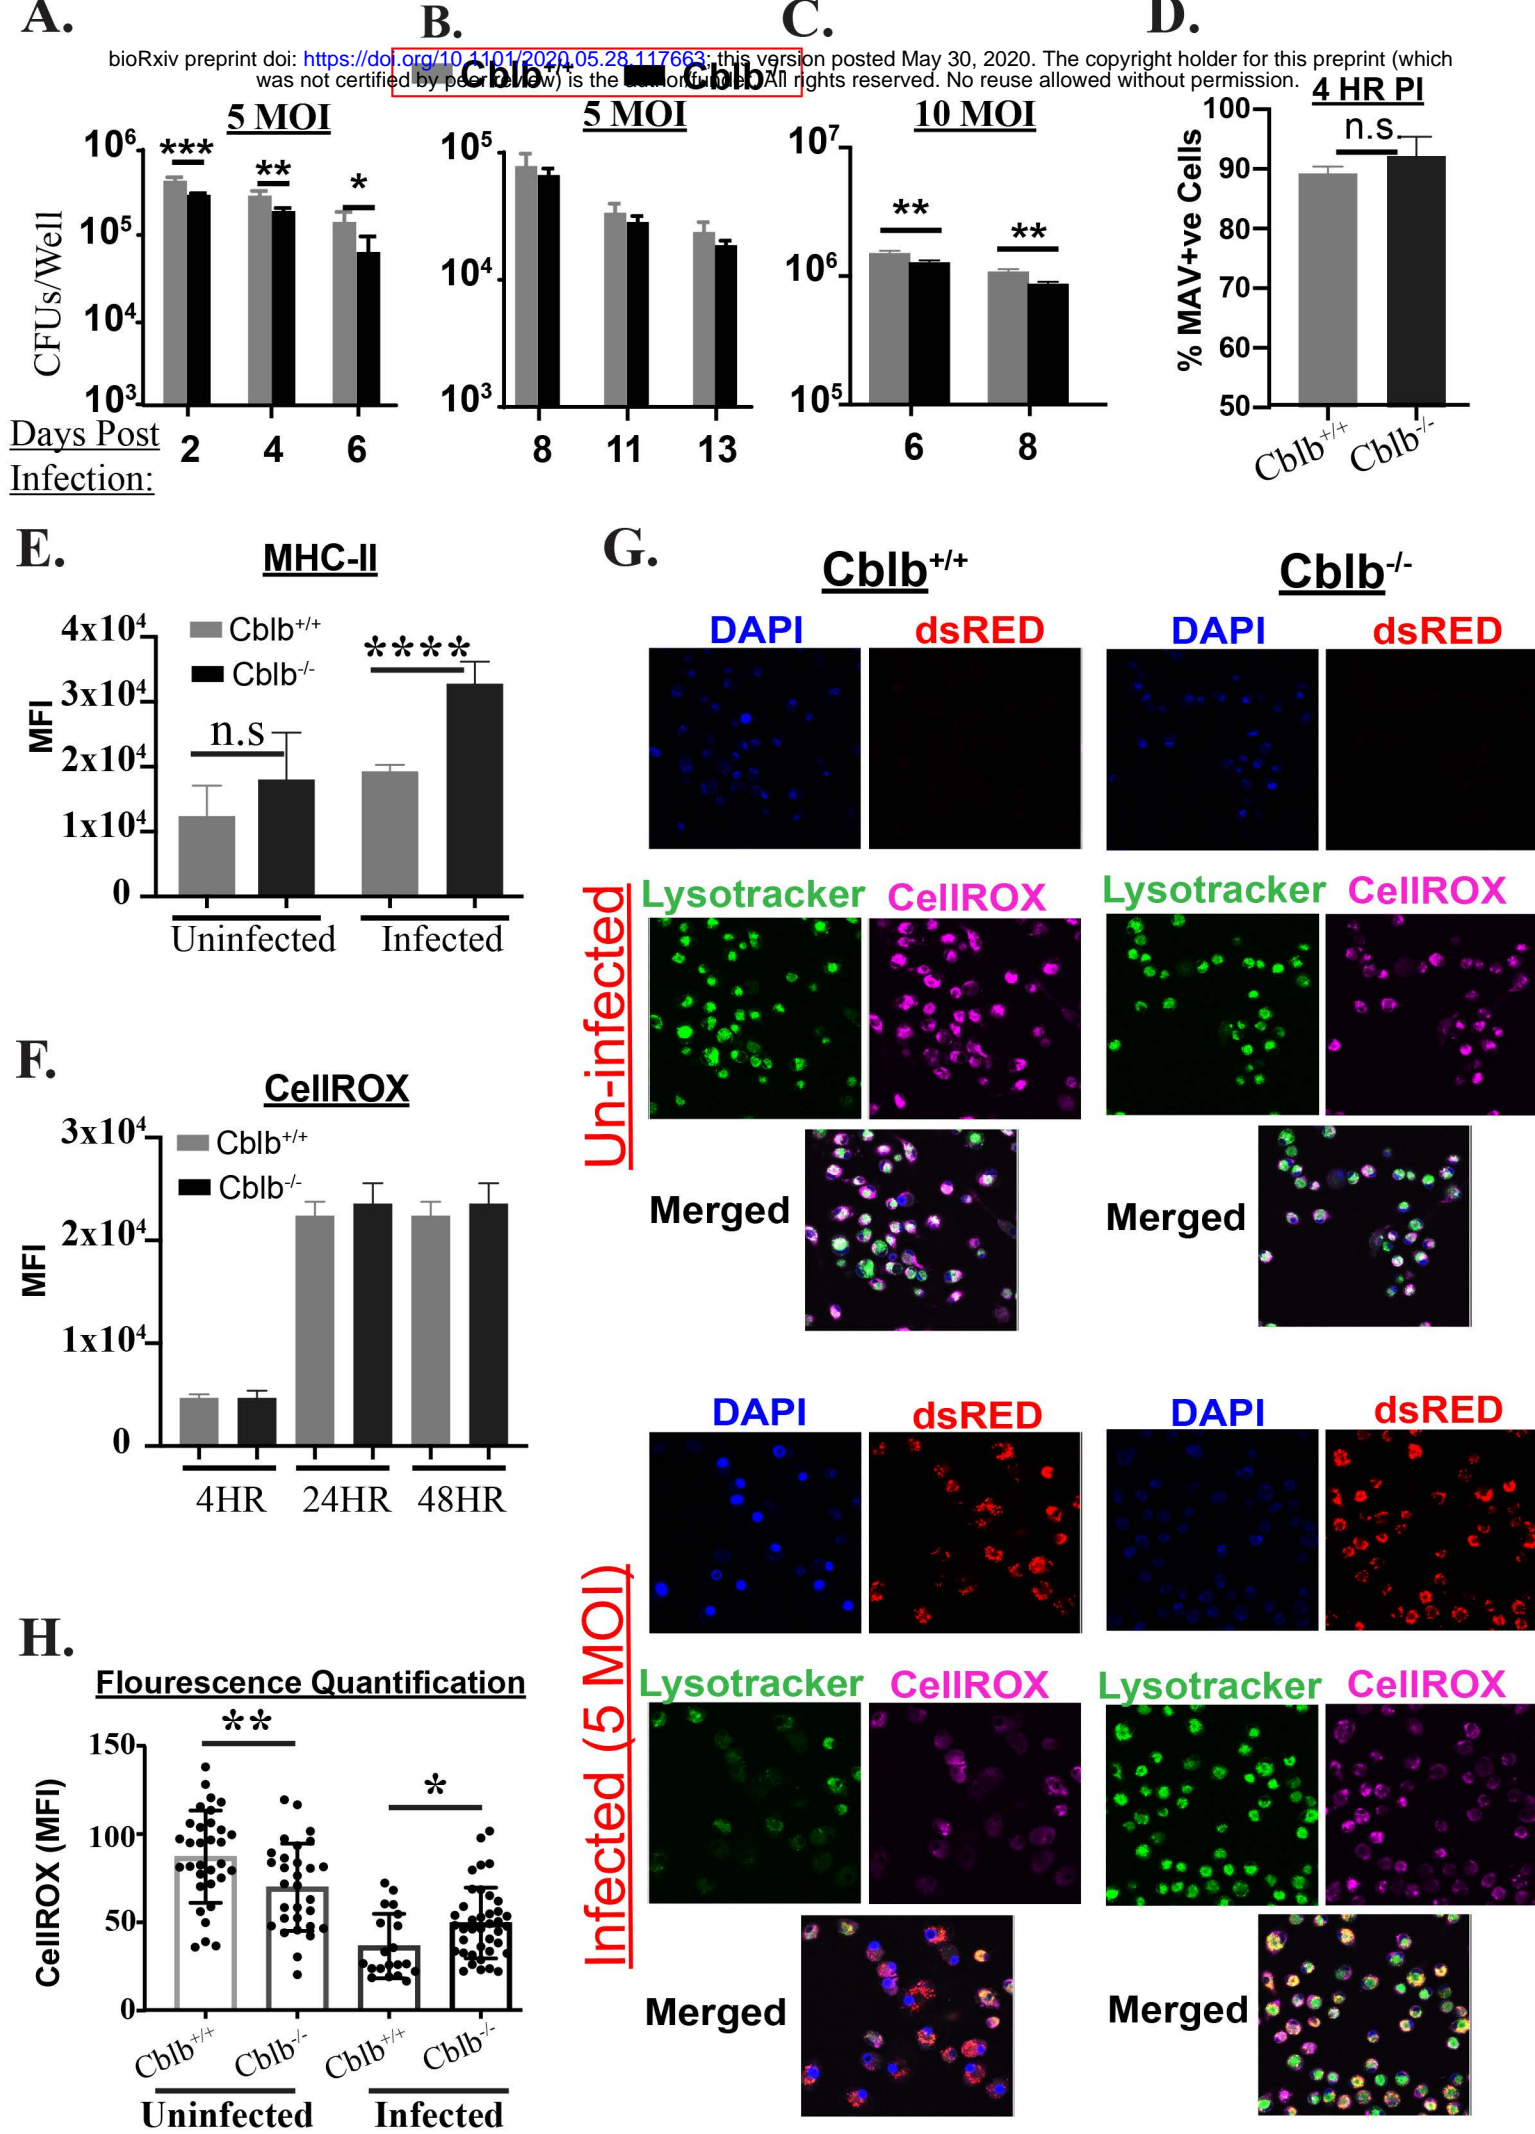

bioRxiv preprint doi: <https://doi.org/10.1101/2020.05.28.117663>; this version posted May 30, 2020. The copyright holder for this preprint (which was not certified by peer review) is the author/funder. All rights reserved. No reuse allowed without permission.

# Figure 4.

A.

bioRxiv preprint doi: <https://doi.org/10.1101/052820>; this version posted May 10, 2020. The copyright holder for this preprint (which was not certified by peer review) is the author/funder. All rights reserved. No reuse allowed without permission.

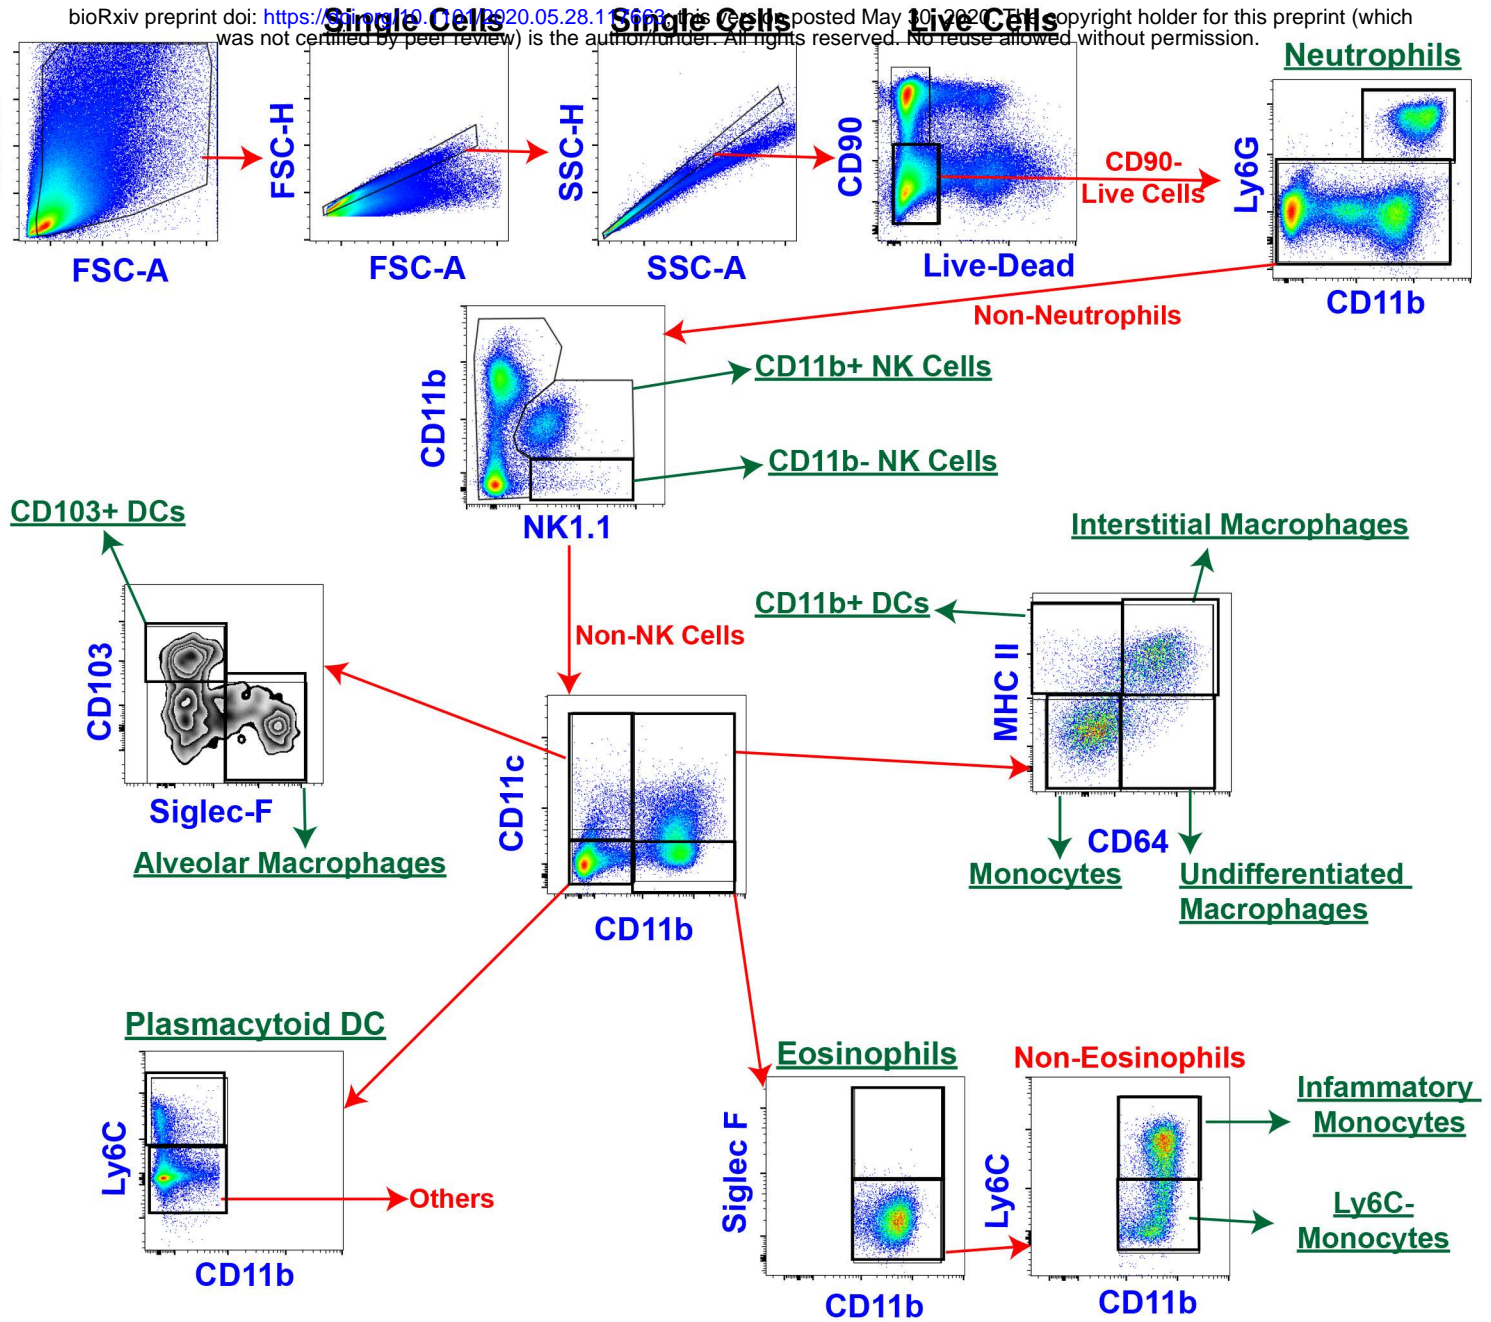

B.

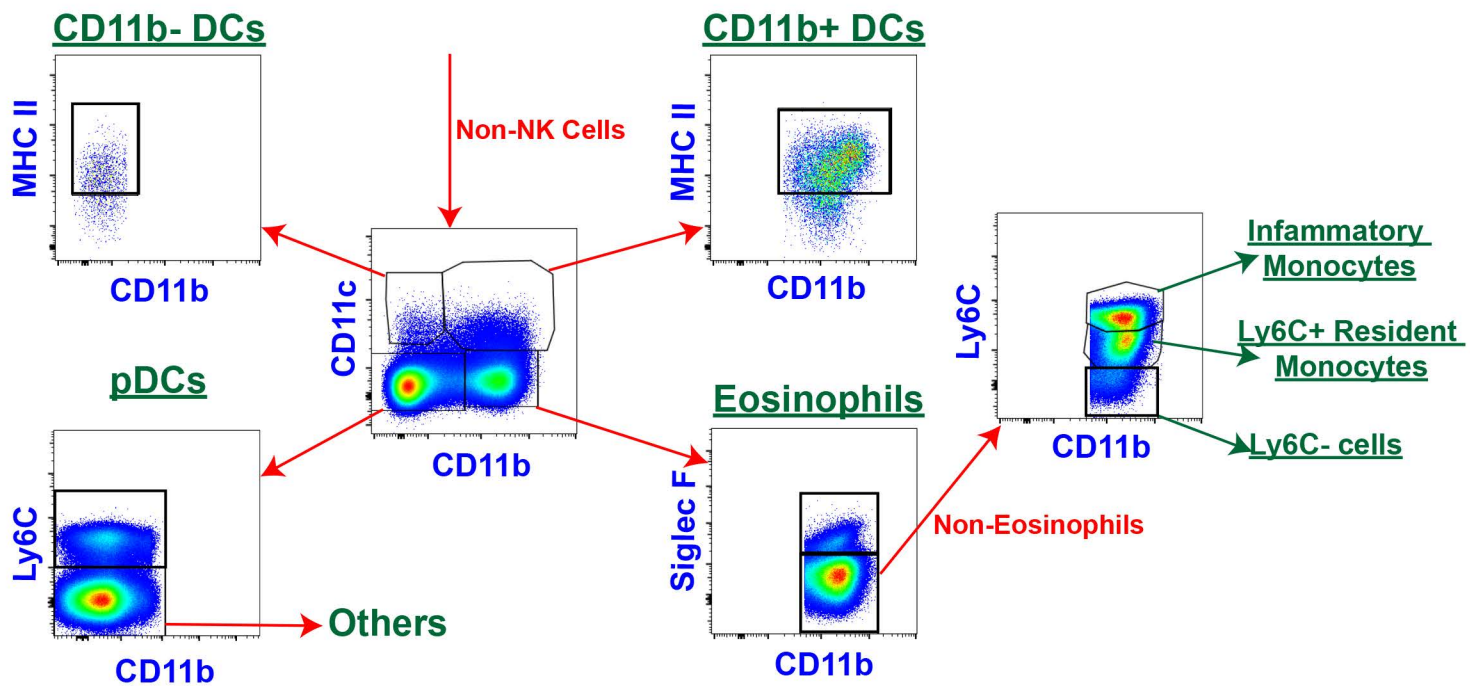

# Figure 5.

**A.**

bioRxiv preprint doi: <https://doi.org/10.1101/2020.05.28.117663>; this version posted May 30, 2020. The copyright holder for this preprint (which was not certified by peer review) is the author/funder. All rights reserved. No reuse allowed without permission.

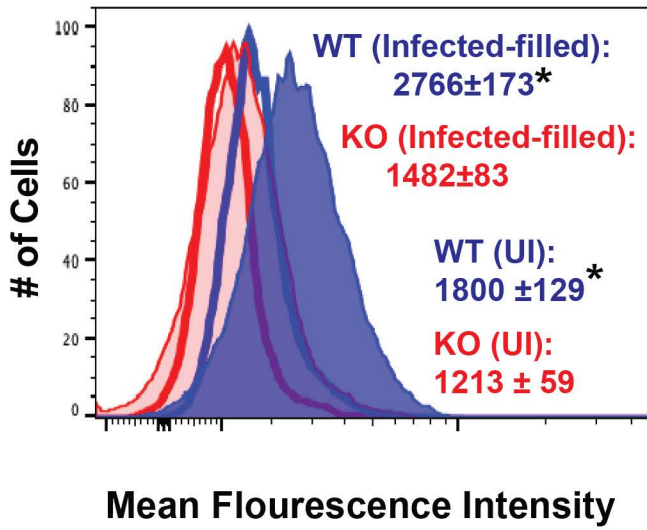

**B.**

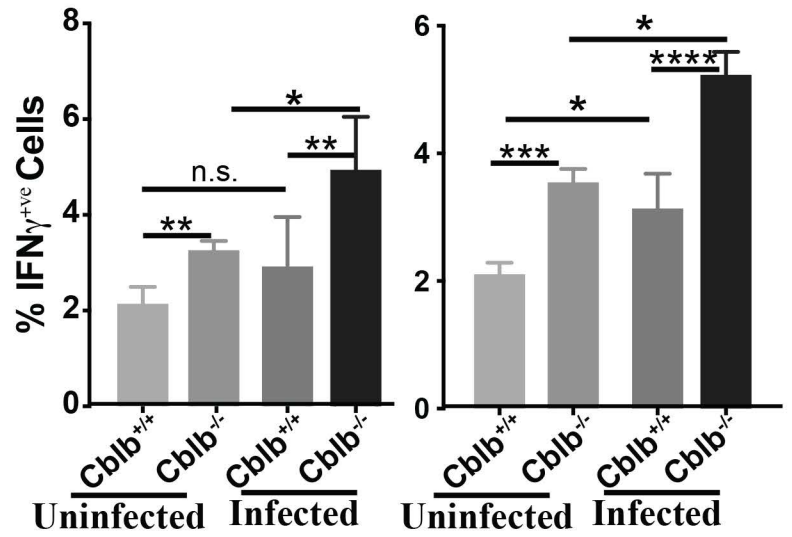

**C.**

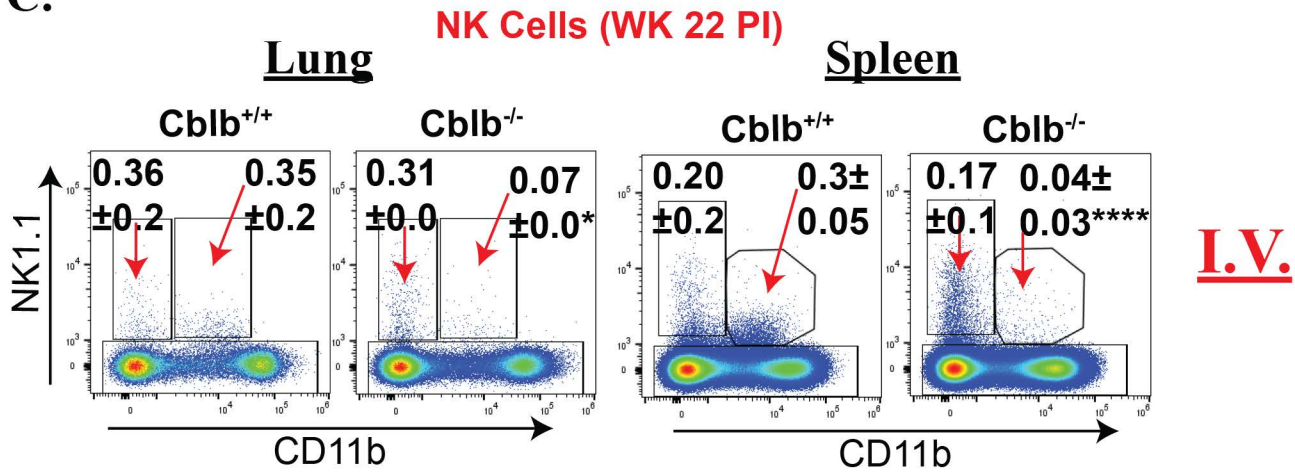

**D.**

**Intravenous**

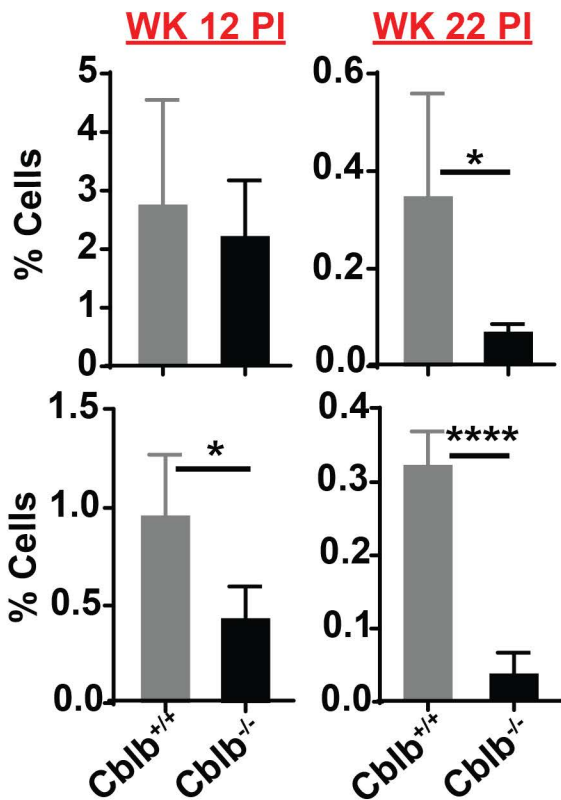

**E.**

**Intratracheal**

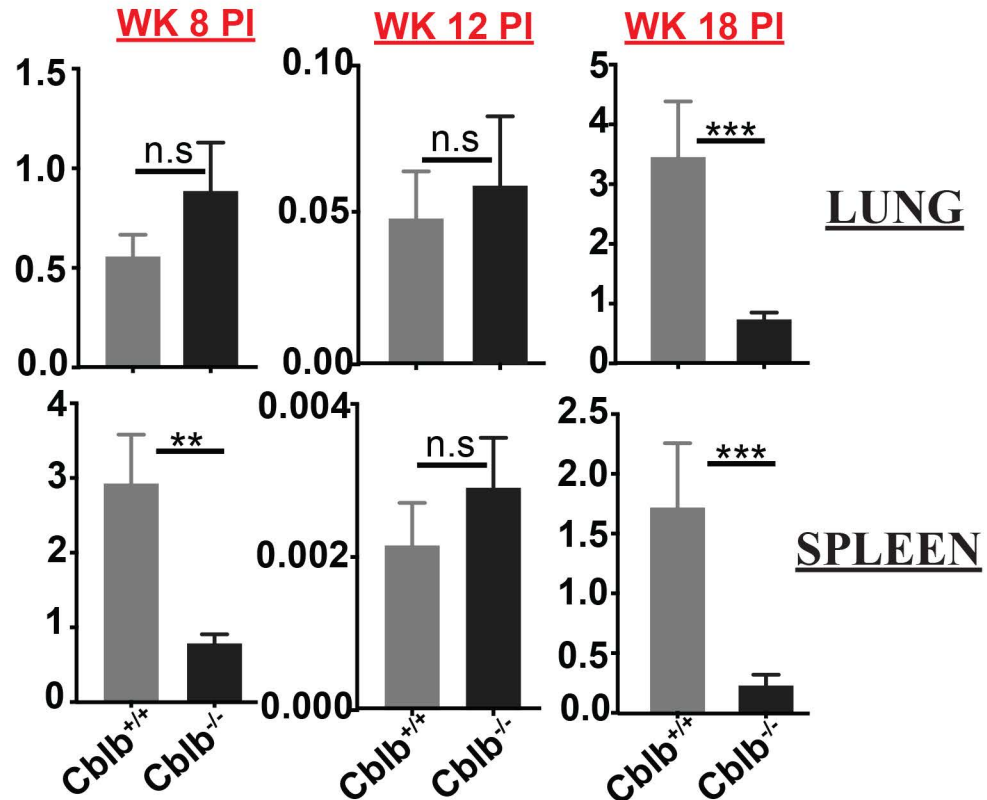

**Figure 6.**

**A.**

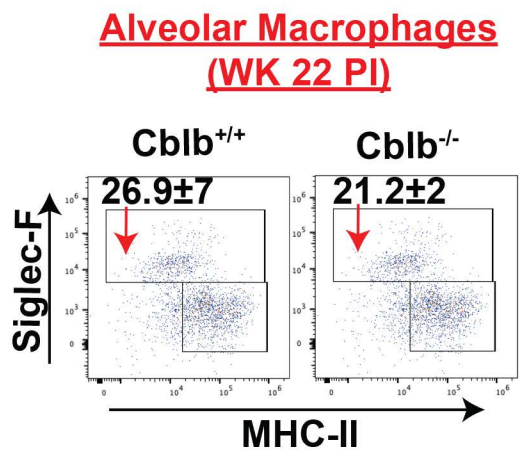

**B.**

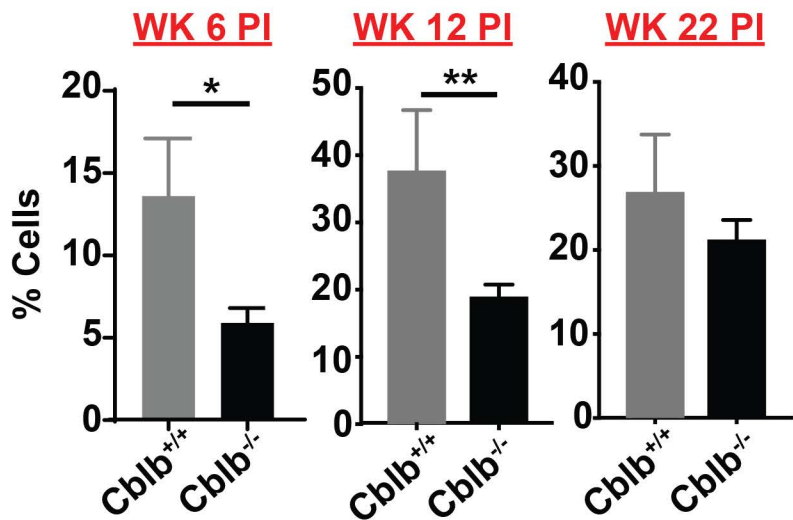

**C.**

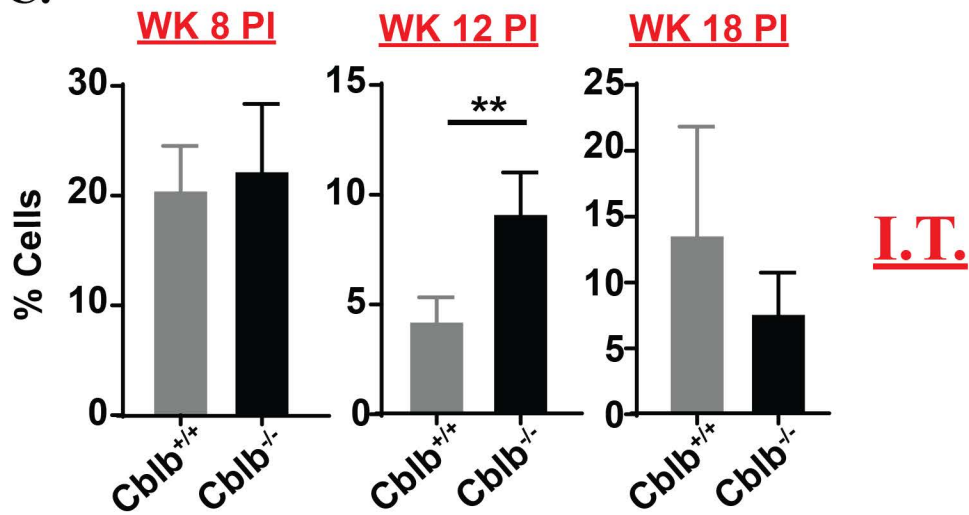



**Figure 7.**

**A.**

**Inflammatory/Resident Monocytes (A1E-22-PS)**

bioRxiv preprint doi: <https://doi.org/10.1101/2020.05.28.117661>; this version posted May 30, 2020. The copyright holder for this preprint (which was not certified by peer review) is the author/funder. All rights reserved. No reuse allowed without permission.

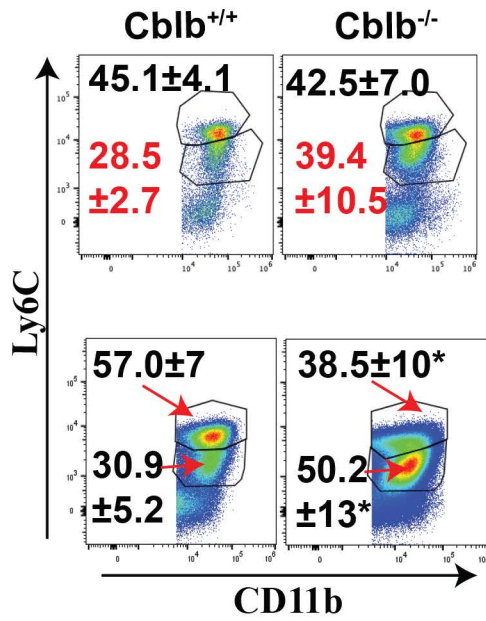

**B.**

**Activated Inflammatory Monocytes**

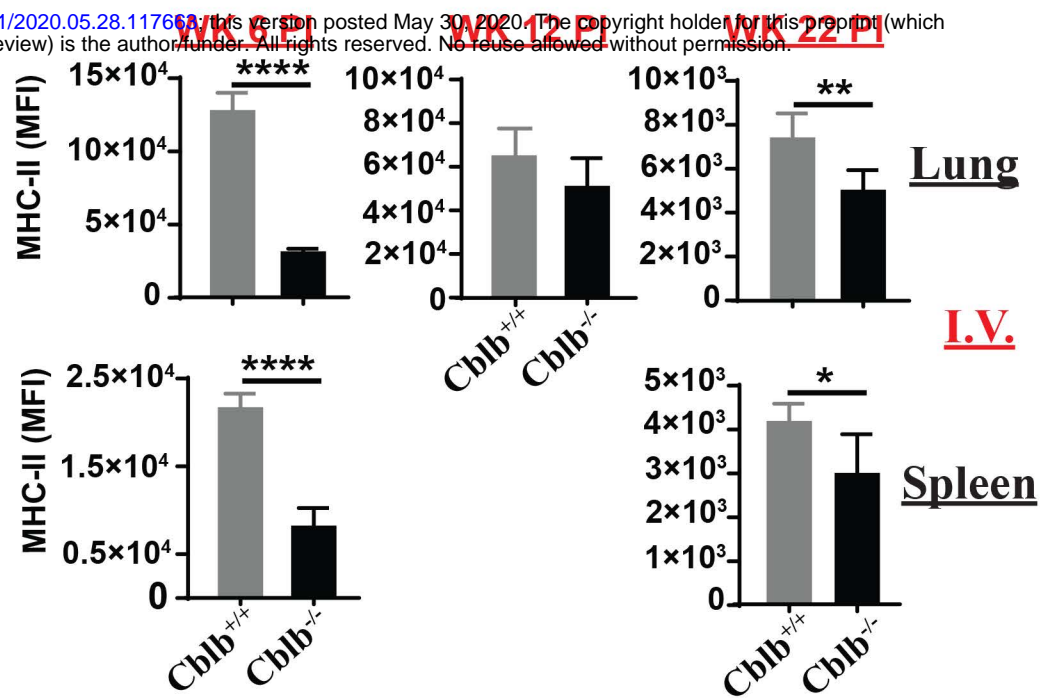

**C.**

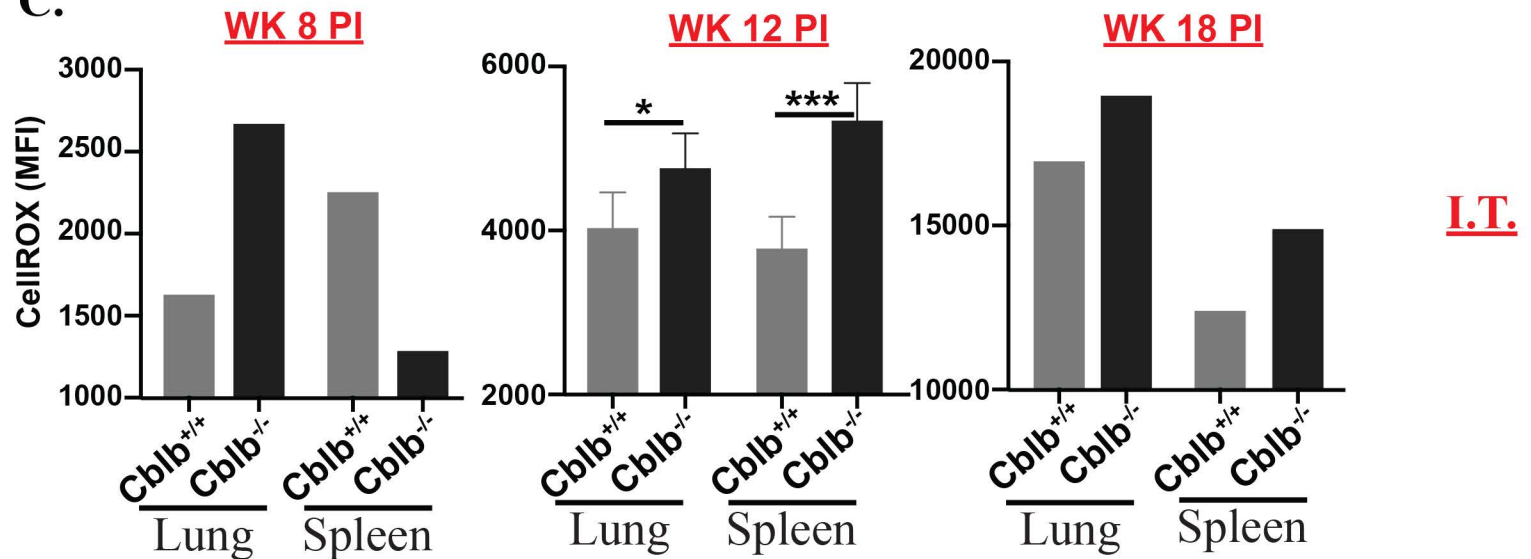

**D.**

**Intravenous**

**Intratracheal**

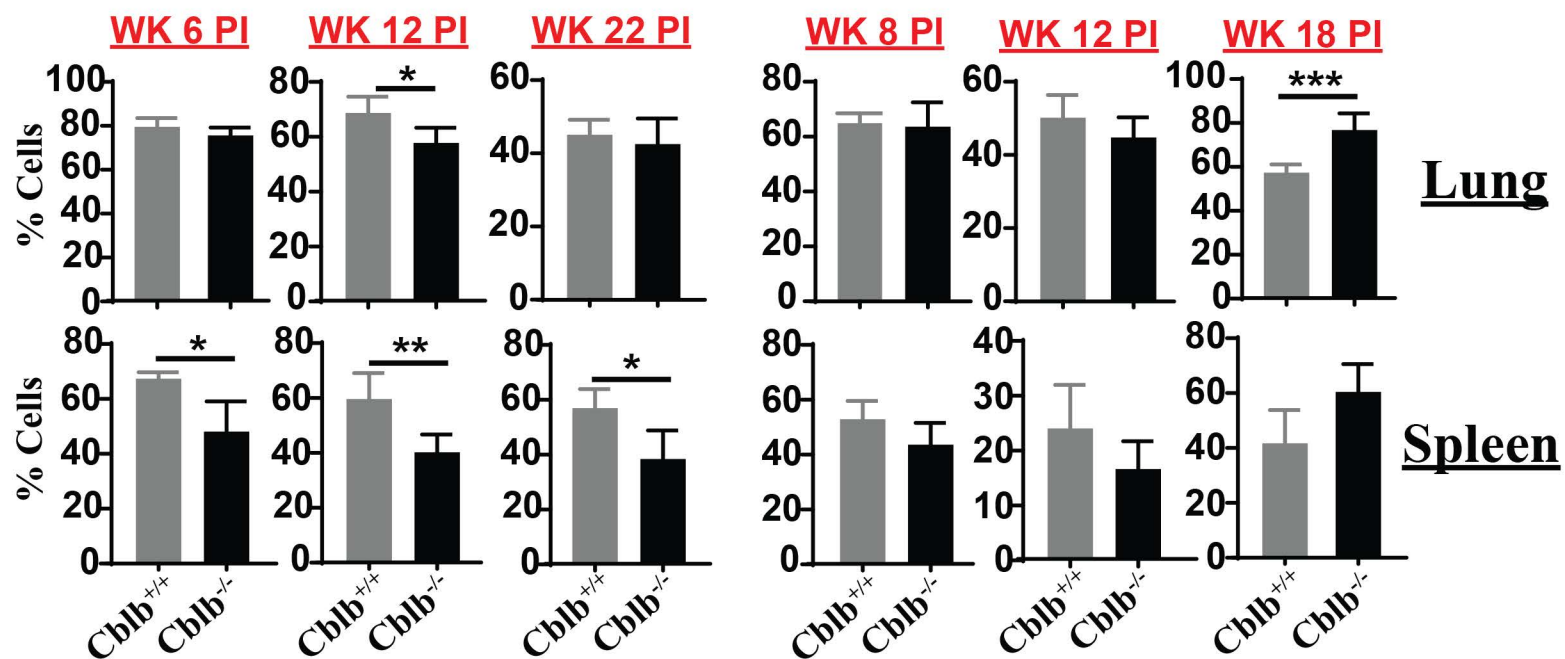

**Figure 8.****A.****Phagocytosis (BMNs)**

bioRxiv preprint doi: <https://doi.org/10.1101/2020.05.28.117663>; this version posted May 30, 2020. The copyright holder for this preprint (which was not certified by peer review) is the author/funder. All rights reserved. No reuse allowed without permission.

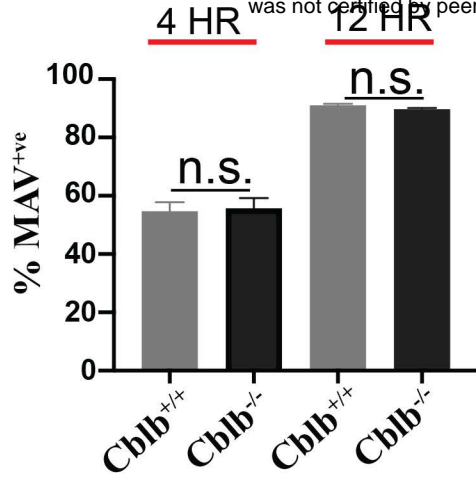**B.****Activated BMNs**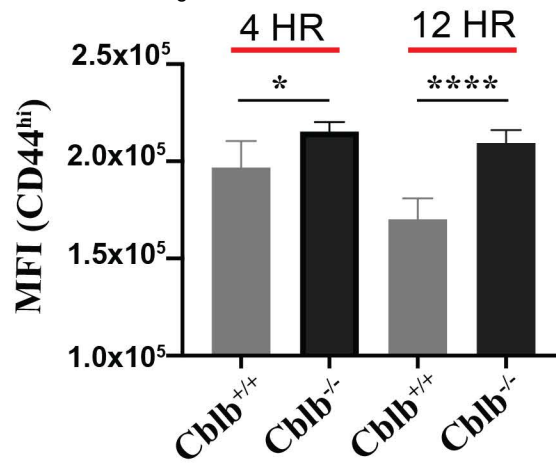**C.****Neutrophils (WK 22 PI)**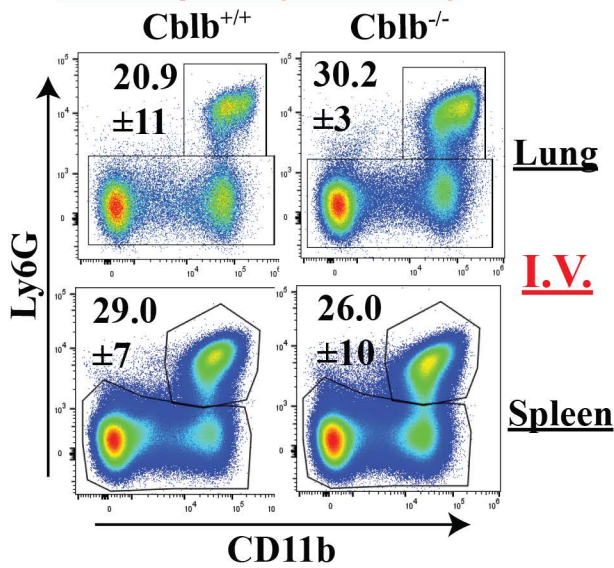**D.**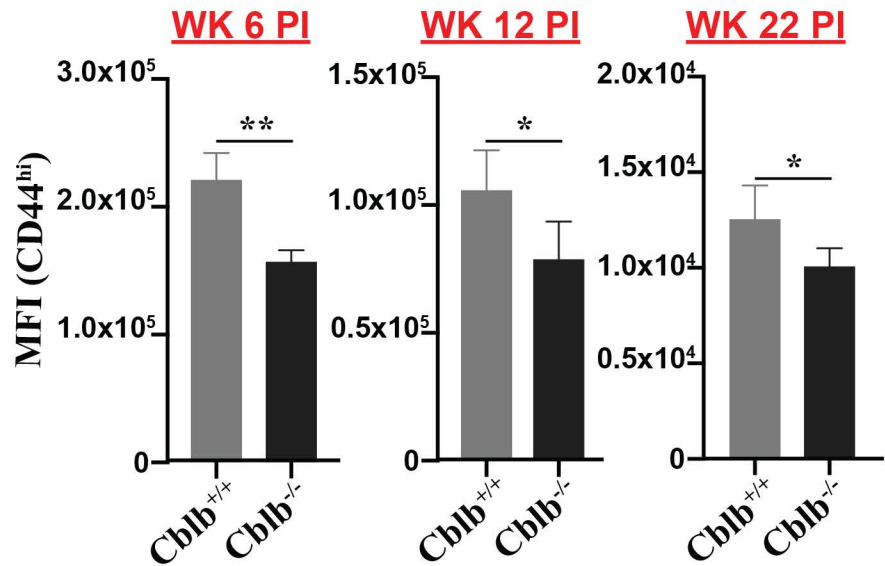**E.****Intravenous****Intratracheal**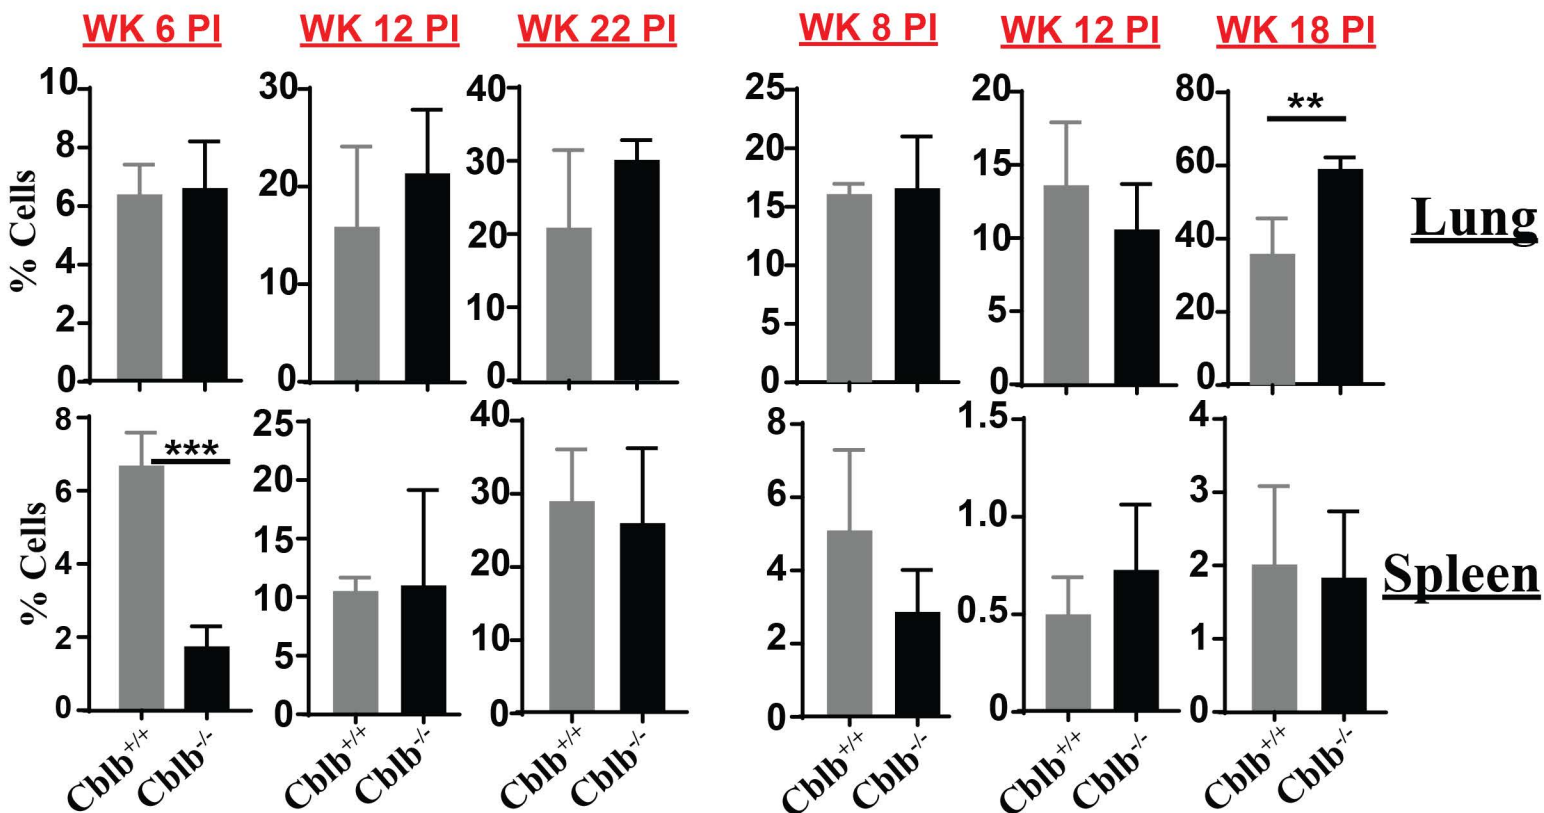

**Figure 9.**

**A.**

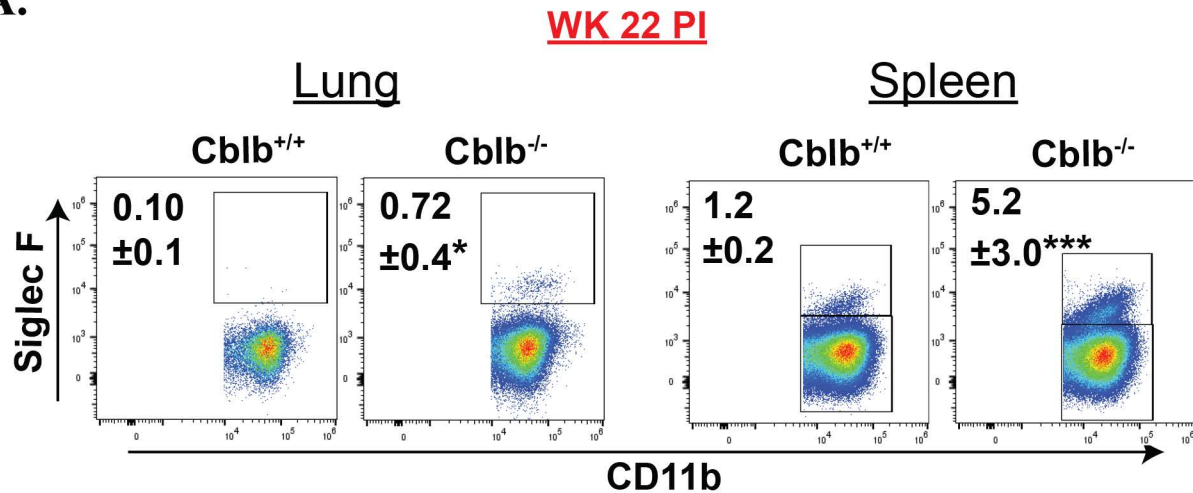

**I.V.**

**B.**

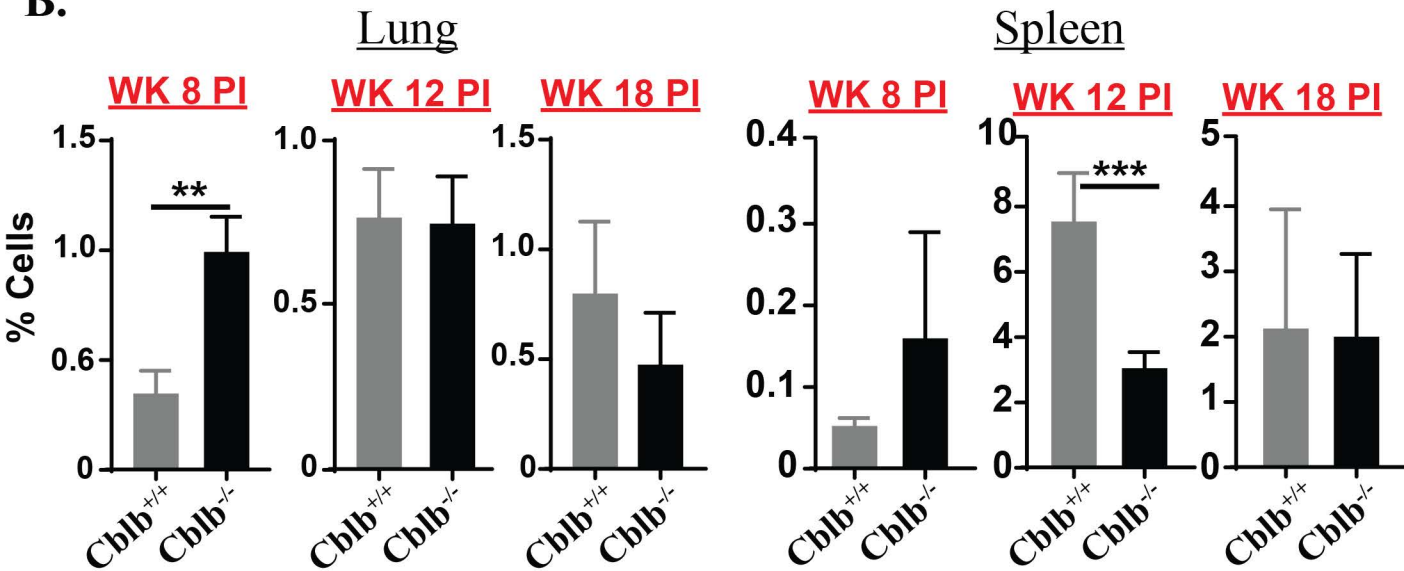

**I.T.**

Figure 10.

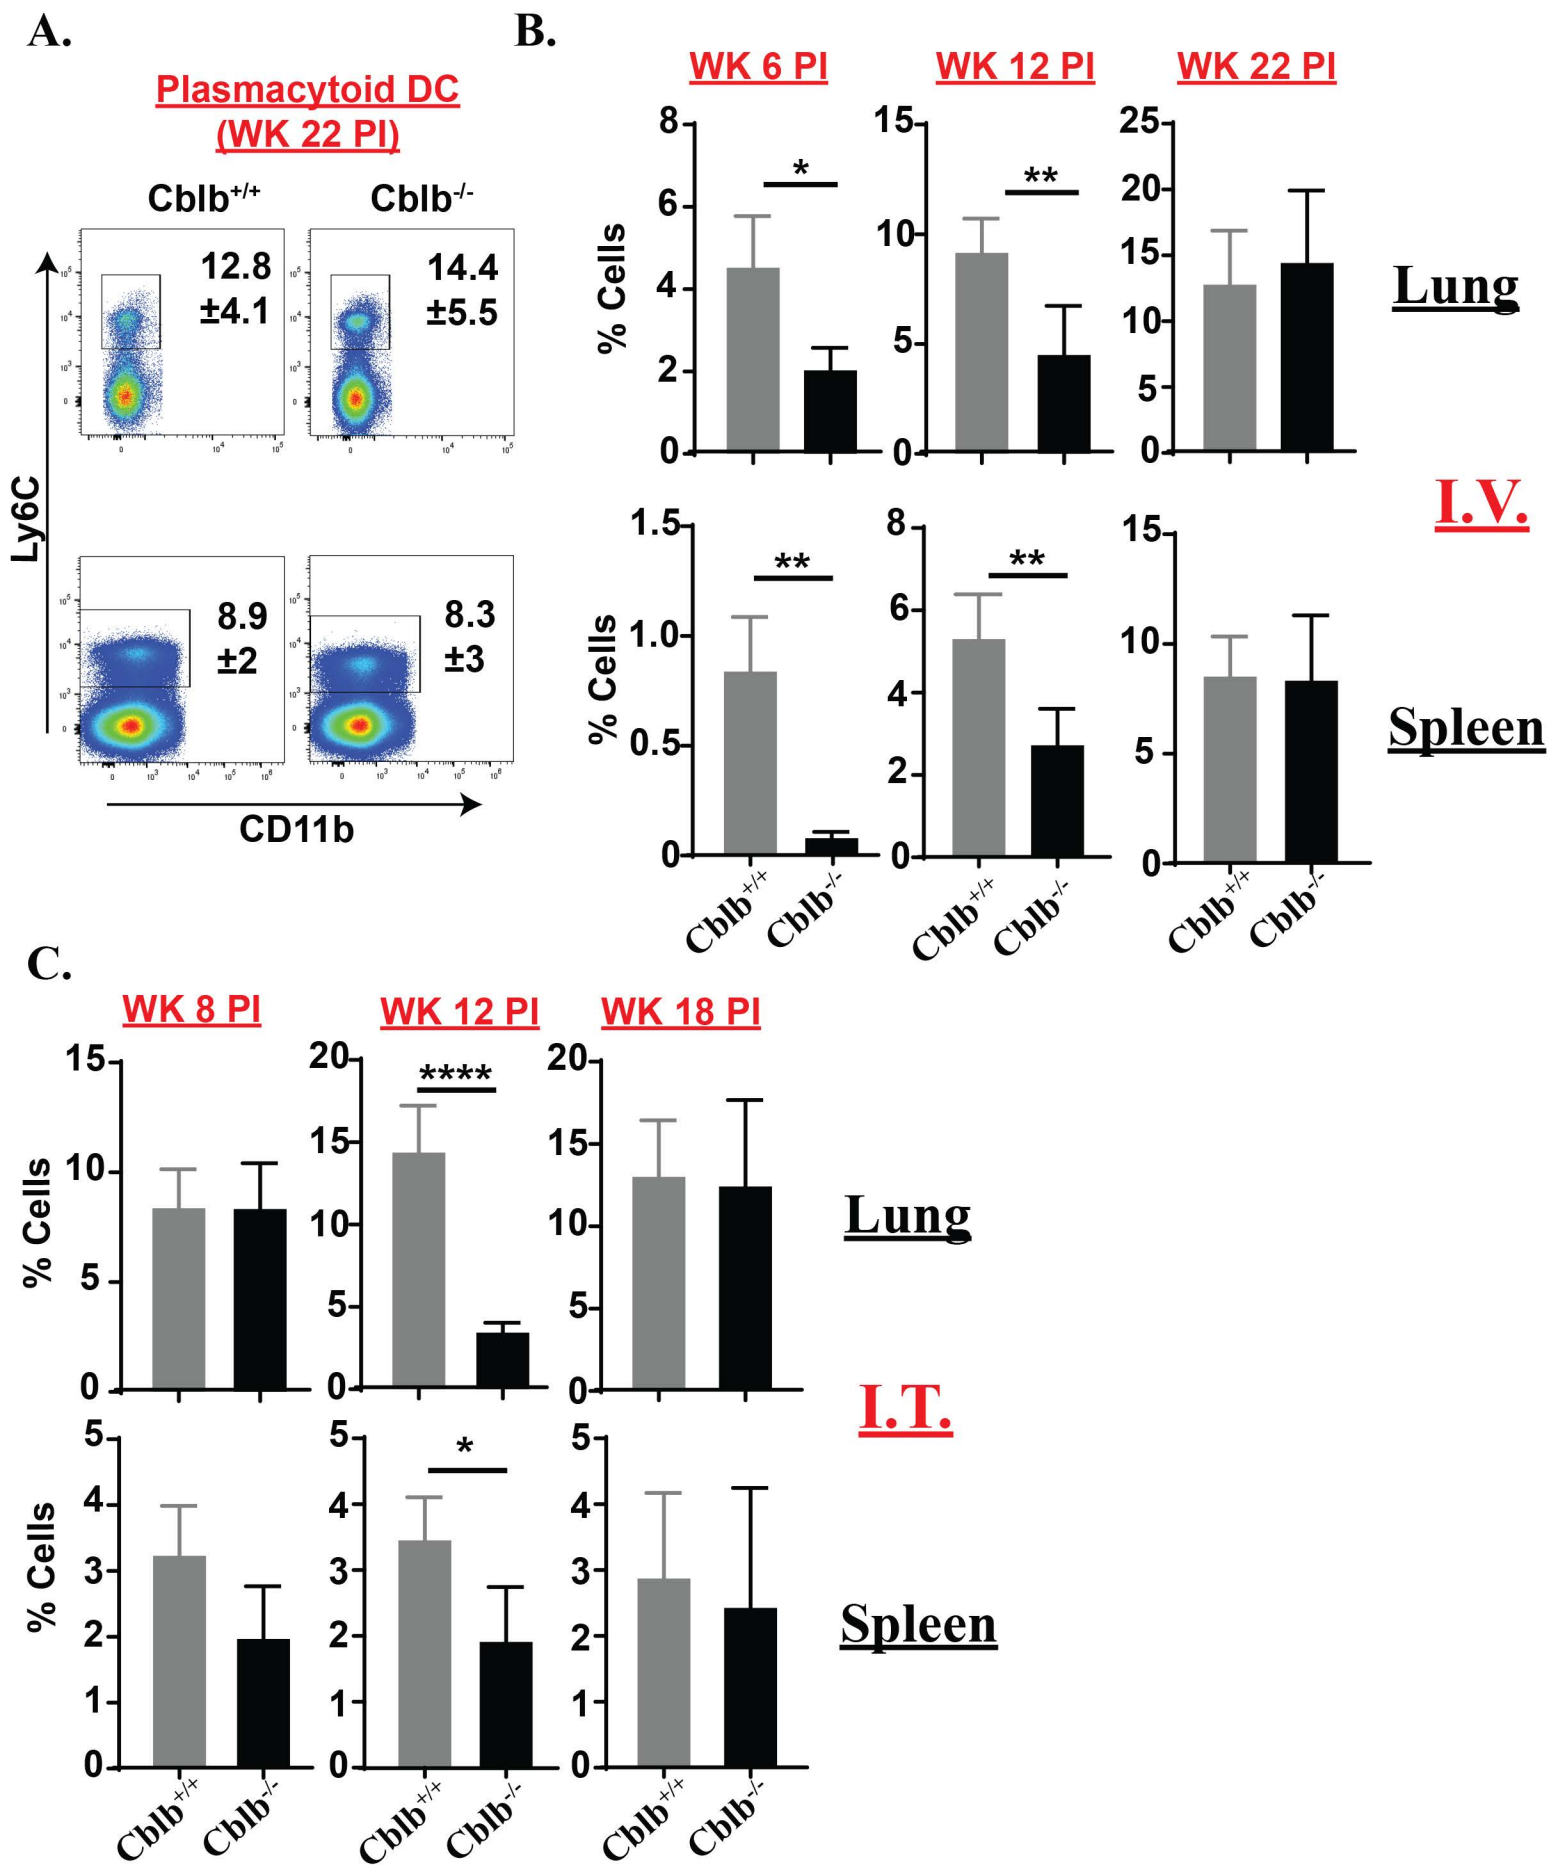

**Figure 11.**

**A.**

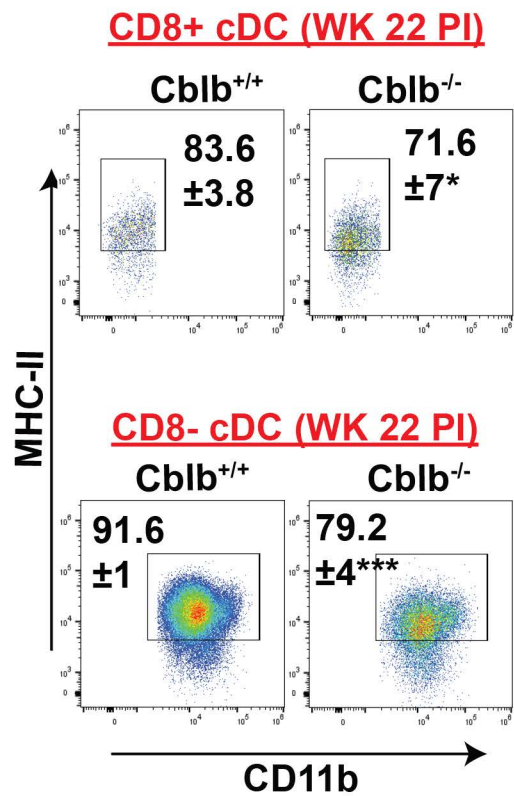

**B.**

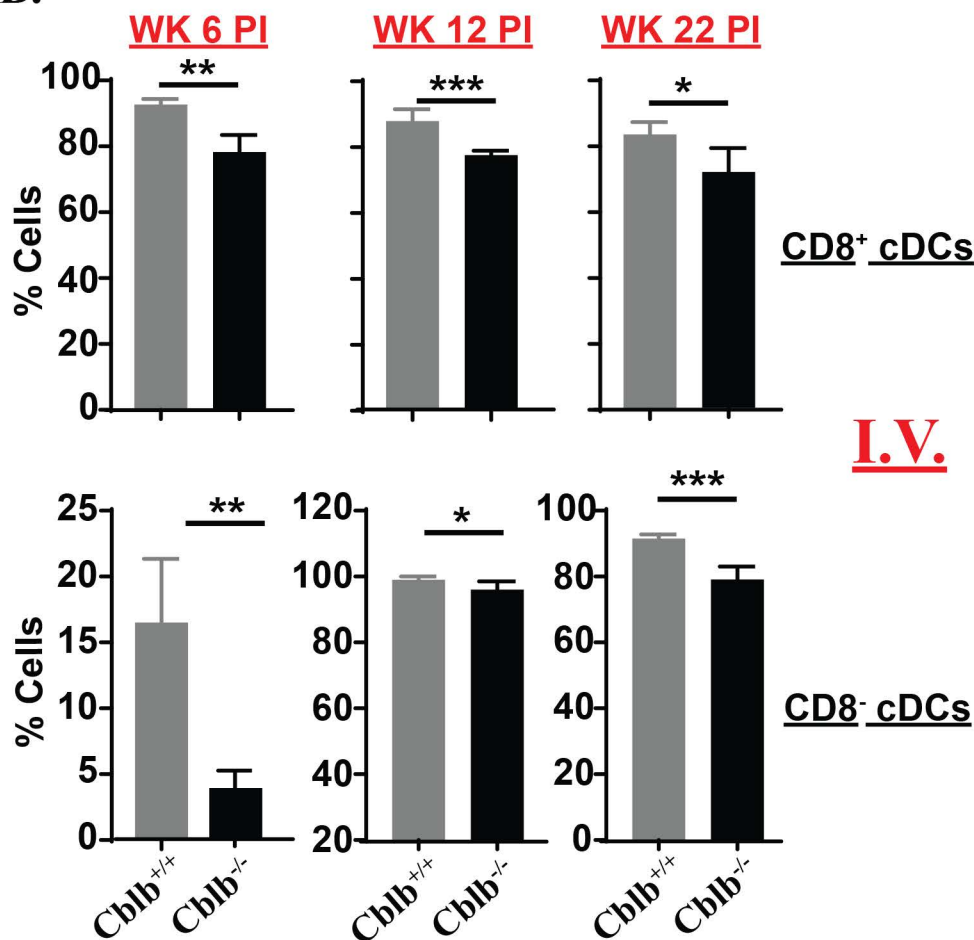

**C.**

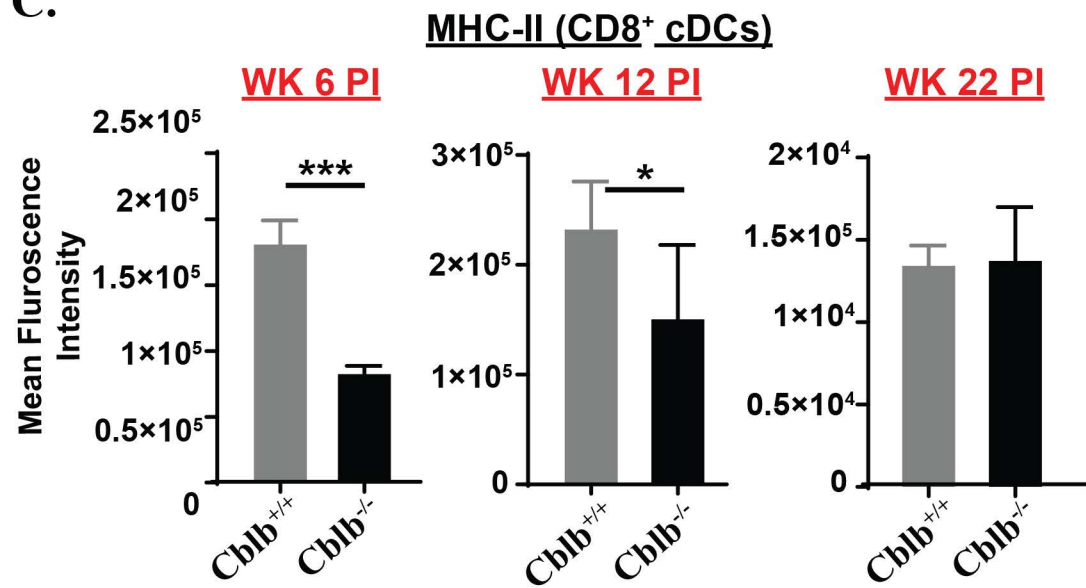

**Figure 12**

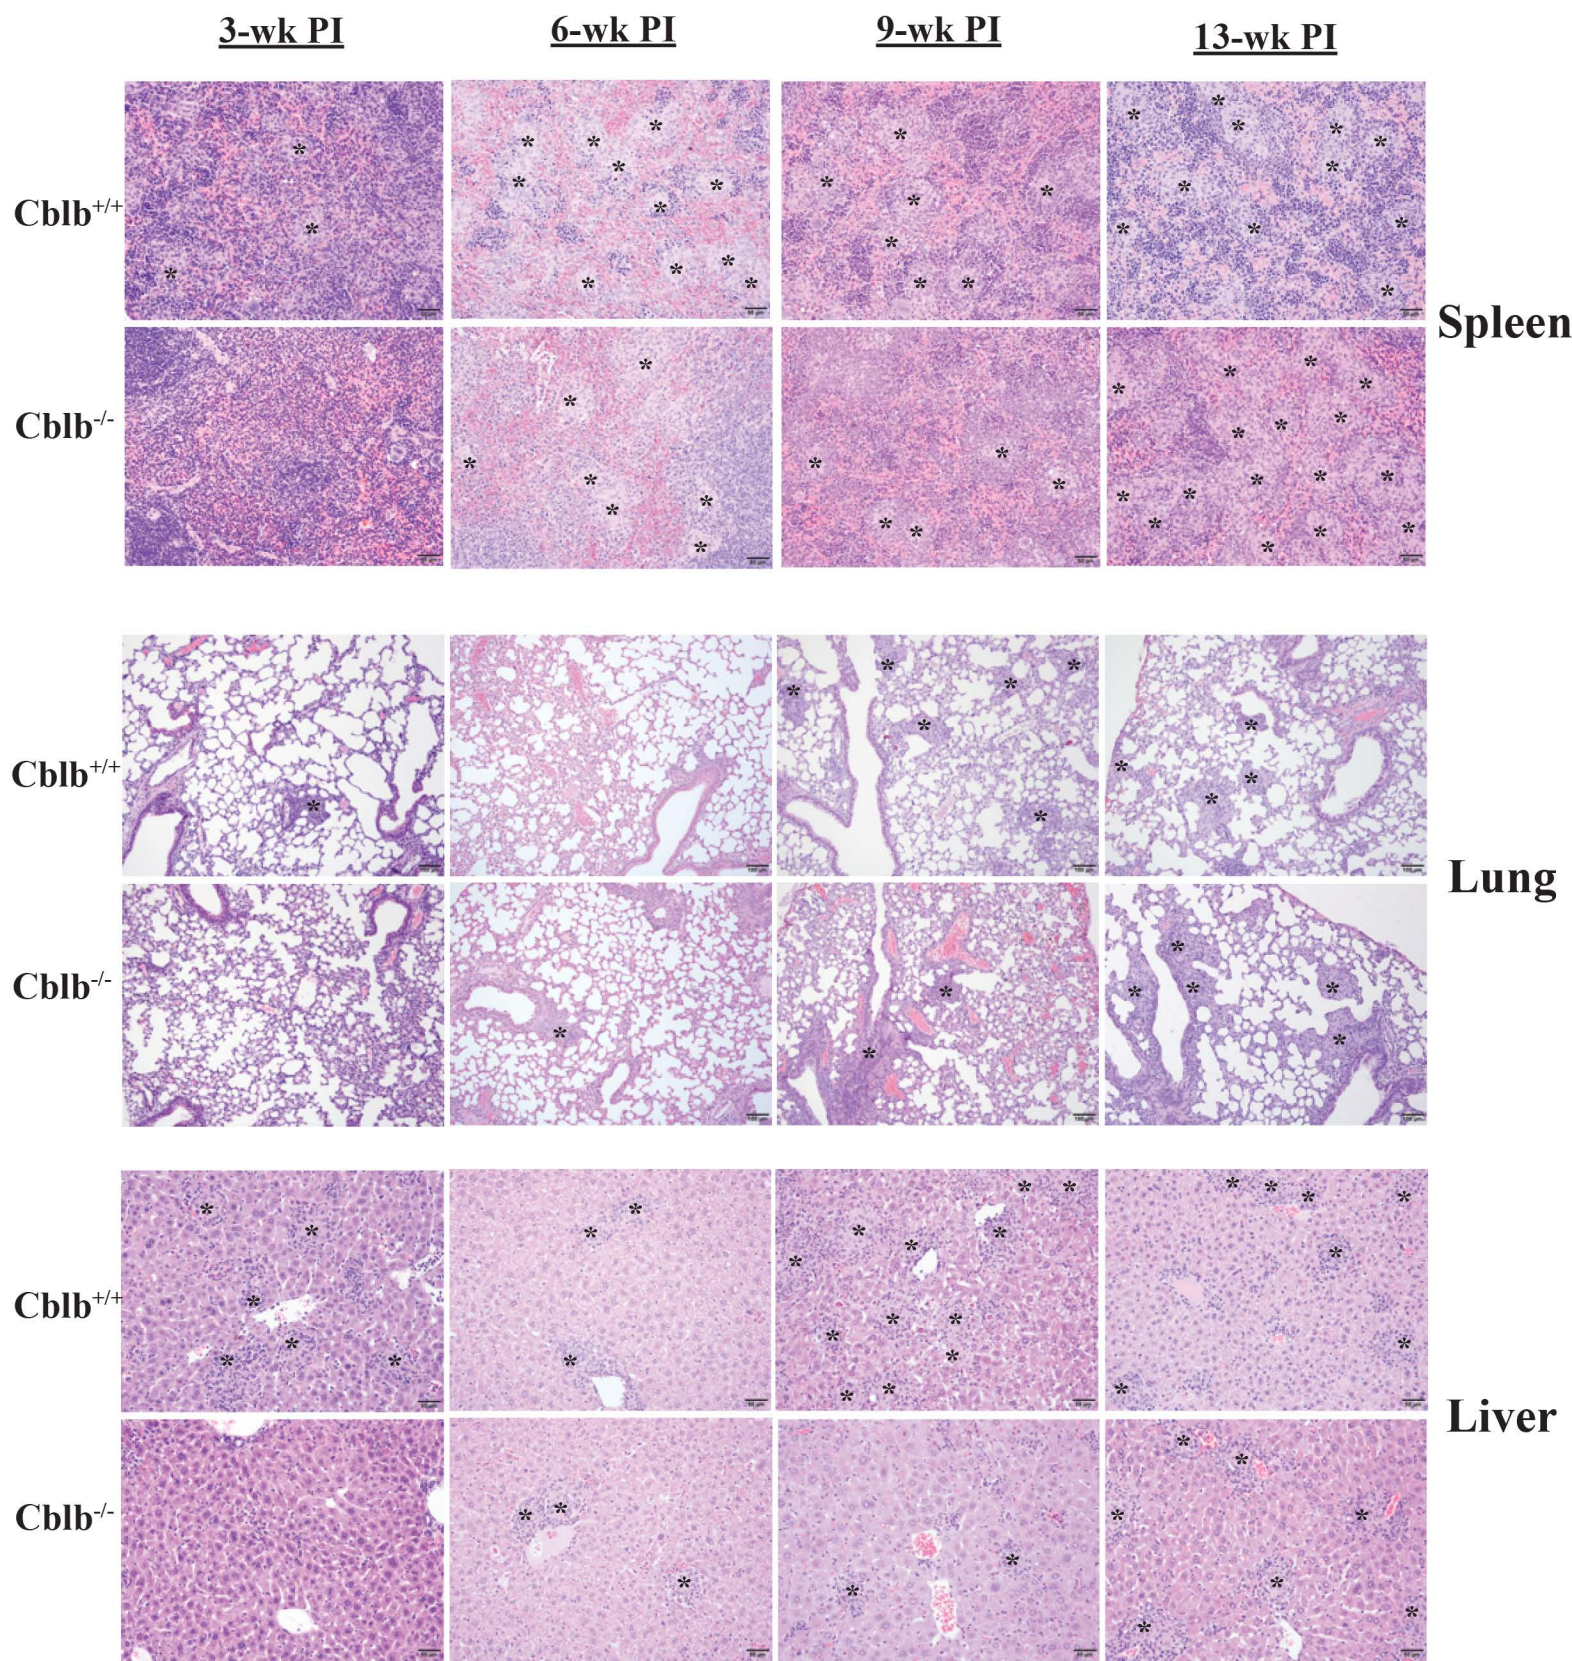

Source: https://www.biorxiv.org/content/10.1101/2020.05.28.117663v1.full.pdf
